# Supplementary material
Source: Copernicus journal article supplement (doi:10.5194/se-17-747-2026)
Supplement: Supplementary file 1 [file se-17-747-2026-supplement.pdf]

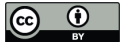

*Supplement of*

## **Persistent deformation in a post-collisional stable continental region: insights from 20 years of cGPS in Romania**

**Alexandra Muntean et al.**

*Correspondence to:* Alexandra Muntean (muntean@infp.ro), Laura Petrescu (laura.petrescu@infp.ro), and Boudewijn Ambrosius (bacambrosius@gmail.com)

The copyright of individual parts of the supplement might differ from the article licence.

## **Contents of this file:**

Table S1: Horizontal velocity solutions at cGPS stations.

Table S2: Gridded horizontal velocity field from cGPS data.

Table S3: Vertical velocity solutions at cGPS stations.

Table S4: Inverted horizontal velocities and derived strain-rate parameters.

Table S5: Residual statistics for each local reference frame method.

Table S6: Changes applied to EU14 velocities by each reference frame method.

Figure S1: Horizontal velocity magnitudes and uncertainty comparison.

Figure S2: Comparison of residual velocity statistics across different reference frame approaches.

Figure S3: Residual statistics for local reference frame corrections relative to EU14 velocities.

Figure S4: Horizontal velocity comparison with Pina-Valdés et al. (2022).

Figure S5: Vertical velocity comparison with Pina-Valdés et al. (2022).

## **S1. Introduction**

This Supplementary Material provides the technical datasets and sensitivity analyses supporting the results presented in the main manuscript. It includes primary geodetic results such as horizontal and vertical velocity solutions, spatially averaged velocity fields, and derived strain-rate parameters for the study region. To evaluate the robustness of these data, the following sections examine how various local reference frame transformations, including Euler pole rotation, network mean removal, and stable station mean removal, affect the GNSS velocity field relative to the original EU14 velocities.

Additionally, this document provides a comparison of horizontal and vertical solutions against independent datasets, such as those from Piña-Valdés et al. (2022). This comparison accounts for differences in observation periods, network density, and processing strategies, specifically regarding the use of manual versus automated quality control. Detailed descriptions of the methodology, statistical residuals, and specific data processing for the associated tables and figures are provided in the respective subsections below.

## **S2. Horizontal and vertical GPS velocities**

Tables S1 and S2 present the horizontal velocity solutions derived from GPS stations using GipsyX software and the spatially averaged velocity field obtained through the gridding and outlier-rejection process described in the main manuscript. The quality and resolution of these horizontal estimates are further detailed in Figure S1, which illustrates the distribution of velocity magnitudes relative to their associated uncertainties and confirms a high signal-to-noise ratio across the network.

Table S3 contains the vertical velocity solutions for all analyzed stations. Finally, Table S4 summarizes the strain-rate parameters calculated from the interpolated horizontal velocity field using the STRAINTOOL software.

Table S1: Horizontal velocities in the Eurasia reference frame

| STAT | LAT     | LON     | Vlat  | Vlon  | Siglat | Siglon | Tstart  | Tspan | NETWORK    |
|------|---------|---------|-------|-------|--------|--------|---------|-------|------------|
| -    | deg     | deg     | mm/yr | mm/yr | mm/yr  | mm/yr  | date    | yrs   | -          |
| ABIU | 46.0777 | 23.5663 | 0.27  | -0.14 | 0.09   | 0.08   | 13FEB21 | 12.26 | NACL       |
| ADCS | 44.0882 | 27.9657 | 0.90  | -0.38 | 0.20   | 0.16   | 19MAY16 | 6.29  | NIEP       |
| ADJU | 46.0954 | 27.1893 | 0.14  | -0.39 | 0.08   | 0.07   | 13JAN03 | 12.40 | NACL       |
| AEGY | 45.1864 | 28.8151 | 0.22  | -0.10 | 0.09   | 0.08   | 13NOV29 | 11.75 | Geopontica |
| AGIG | 44.0866 | 28.6419 | 0.16  | -0.01 | 0.09   | 0.08   | 13JUN13 | 12.22 | Geopontica |
| ALXR | 43.9699 | 25.3266 | -0.79 | 0.44  | 0.09   | 0.09   | 13JAN04 | 12.39 | NACL       |
| ARAD | 46.1732 | 21.3446 | 0.41  | -0.16 | 0.08   | 0.07   | 13JAN02 | 12.40 | NACL       |
| ARYB | 47.6180 | 25.2110 | 0.38  | -0.40 | 0.17   | 0.17   | 16JUN24 | 9.18  | NIEP       |
| BABA | 44.8841 | 28.7351 | 0.10  | 0.02  | 0.08   | 0.08   | 13JUN13 | 12.21 | Geopontica |
| BACA | 46.5621 | 26.9122 | 0.10  | -0.48 | 0.05   | 0.05   | 06JAN20 | 19.29 | NACL       |
| BAES | 44.0292 | 23.3111 | -0.87 | -0.39 | 0.12   | 0.12   | 17APR20 | 8.36  | NIEP       |
| BAIA | 47.6518 | 23.5577 | -0.12 | -0.02 | 0.05   | 0.05   | 06JAN20 | 19.35 | NACL       |
| BAIS | 44.0223 | 23.3405 | -0.79 | 0.03  | 0.09   | 0.09   | 13JAN03 | 12.40 | NACL       |
| BANL | 45.3828 | 21.1367 | -0.09 | 0.64  | 0.19   | 0.16   | 17APR28 | 7.85  | NIEP       |
| BEU  | 46.6694 | 22.3514 | -0.23 | -0.38 | 0.12   | 0.13   | 13AUG07 | 10.48 | NACL       |
| BICA | 46.8242 | 25.8514 | 0.03  | -0.08 | 0.12   | 0.11   | 16JAN01 | 9.66  | NIEP       |
| BIST | 47.1289 | 24.4940 | -0.24 | -0.07 | 0.11   | 0.07   | 13JAN05 | 12.39 | NACL       |
| BORS | 47.0903 | 21.7858 | 0.42  | 0.42  | 0.16   | 0.17   | 15NOV19 | 9.78  | NIEP       |
| BRLD | 46.2330 | 27.6443 | -1.06 | -1.34 | 0.18   | 0.17   | 19MAR14 | 6.47  | NIEP       |
| BUCE | 45.4132 | 25.4703 | -0.00 | 0.31  | 0.08   | 0.08   | 02MAY15 | 22.38 | NIEP       |
| BUKU | 44.4639 | 26.1257 | -1.08 | -0.18 | 0.04   | 0.04   | 00AUG18 | 24.77 | NACL       |
| BUZE | 45.6191 | 21.6394 | -0.14 | 0.28  | 0.07   | 0.07   | 07JUL18 | 18.12 | NIEP       |
| CALR | 44.2051 | 27.3134 | -0.25 | 0.11  | 0.09   | 0.08   | 13APR11 | 12.13 | NACL       |
| CHIE | 45.4245 | 29.2890 | -0.01 | -0.05 | 0.09   | 0.08   | 13JUN14 | 12.21 | Geopontica |
| CHIT | 44.4941 | 28.8385 | 0.08  | -0.21 | 0.09   | 0.08   | 13MAY23 | 12.27 | Geopontica |
| CIUC | 46.3610 | 25.8015 | -0.22 | -0.17 | 0.09   | 0.08   | 13JAN03 | 12.39 | NACL       |
| CLU2 | 46.7725 | 23.6248 | 0.93  | 0.54  | 0.22   | 0.18   | 19OCT03 | 5.65  | NACL       |
| CONB | 44.2138 | 28.6453 | 0.18  | 0.09  | 0.12   | 0.13   | 16JUN24 | 9.18  | NIEP       |
| CORA | 43.7748 | 24.5022 | -0.30 | -0.12 | 0.10   | 0.08   | 13AUG07 | 11.80 | NACL       |
| COST | 44.1615 | 28.6575 | -0.09 | -0.05 | 0.06   | 0.05   | 06JAN04 | 19.39 | NACL       |
| CRAI | 44.3380 | 23.7645 | -1.01 | -0.02 | 0.09   | 0.08   | 13JAN25 | 12.33 | NACL       |
| CRCL | 45.1781 | 28.1363 | 0.54  | 0.19  | 0.10   | 0.09   | 14JAN04 | 11.65 | NIEP       |
| CRNV | 44.3421 | 28.0312 | 0.20  | -0.17 | 0.09   | 0.10   | 13AUG06 | 11.80 | NACL       |
| DEVA | 45.8784 | 22.9135 | -0.93 | 0.09  | 0.08   | 0.06   | 09JAN02 | 16.40 | NACL       |
| DRMN | 46.3685 | 26.4905 | -0.08 | -0.15 | 0.10   | 0.08   | 14JAN09 | 11.38 | NACL       |
| DRTS | 44.6272 | 22.6345 | -0.17 | 0.30  | 0.09   | 0.10   | 13AUG07 | 10.46 | NACL       |
| DUNA | 45.0184 | 29.2738 | 0.08  | -0.14 | 0.11   | 0.07   | 13JUN14 | 11.16 | Geopontica |
| FAGA | 45.8462 | 24.9687 | -1.26 | -0.67 | 0.10   | 0.09   | 13AUG07 | 11.80 | NACL       |
| FAGE | 45.8546 | 22.1772 | -0.01 | -0.48 | 0.09   | 0.07   | 13AUG03 | 11.82 | NACL       |
| FOCS | 45.7083 | 27.1946 | 0.29  | 0.04  | 0.10   | 0.08   | 13JAN03 | 12.39 | NACL       |
| GHE1 | 46.7248 | 25.5984 | 0.15  | -0.33 | 0.08   | 0.08   | 13AUG07 | 11.80 | NACL       |
| GIUR | 43.8863 | 25.9617 | -1.44 | 1.34  | 0.08   | 0.08   | 13JAN25 | 12.33 | NACL       |
| GPOR | 44.6754 | 28.9872 | 0.22  | 0.30  | 0.09   | 0.10   | 13MAY16 | 12.29 | Geopontica |
| GURA | 46.2665 | 22.3378 | 0.28  | 0.60  | 0.12   | 0.09   | 13AUG07 | 11.80 | NACL       |
| HIST | 44.5471 | 28.7702 | -0.04 | -0.13 | 0.04   | 0.04   | 03SEP08 | 21.98 | NIEP       |
| HORE | 45.1456 | 23.9891 | 0.41  | -0.50 | 0.11   | 0.09   | 14NOV27 | 10.50 | NACL       |
| HUED | 46.8653 | 23.0322 | 0.33  | 0.05  | 0.08   | 0.07   | 13FEB01 | 12.32 | NACL       |
| INSU | 44.9112 | 27.6032 | 0.13  | -0.10 | 0.11   | 0.08   | 13JAN03 | 12.40 | NACL       |
| ISTR | 44.5724 | 28.7113 | 0.43  | -0.35 | 0.10   | 0.08   | 13AUG07 | 11.80 | NACL       |
| LACP | 45.8233 | 26.3753 | 1.46  | -0.14 | 0.20   | 0.13   | 04AUG11 | 21.05 | NIEP       |
| LEHL | 44.4422 | 26.8511 | -0.38 | 0.88  | 0.17   | 0.18   | 13AUG07 | 11.80 | NACL       |
| MAJA | 47.0545 | 27.2530 | 0.67  | -0.17 | 0.18   | 0.23   | 13SEP06 | 11.98 | NIEP       |
| MEDS | 46.1627 | 24.3469 | 0.21  | -0.46 | 0.13   | 0.09   | 13JAN26 | 12.33 | NACL       |
| MIDI | 44.3462 | 28.6829 | -0.04 | 0.08  | 0.09   | 0.08   | 13MAY23 | 12.27 | Geopontica |
| MNG2 | 43.8011 | 28.5953 | -0.42 | -0.25 | 0.08   | 0.07   | 13OCT24 | 11.85 | NIEP       |
| MNGA | 43.8106 | 28.5586 | -0.08 | -0.00 | 0.08   | 0.10   | 13MAY22 | 11.93 | Geopontica |
| MNGL | 43.8093 | 28.5801 | 0.07  | 0.00  | 0.09   | 0.07   | 13FEB23 | 12.26 | NACL       |
| NEHU | 45.4172 | 26.3023 | -1.18 | 0.64  | 0.13   | 0.10   | 13JAN26 | 12.33 | NACL       |
| ODO1 | 46.3070 | 25.2942 | -0.16 | -0.07 | 0.08   | 0.07   | 13AUG07 | 11.80 | NACL       |
| ORAD | 47.0592 | 21.9416 | -1.25 | -0.30 | 0.12   | 0.09   | 13AUG07 | 11.80 | NACL       |
| PASC | 47.2491 | 26.7387 | 0.39  | -0.59 | 0.09   | 0.09   | 13AUG07 | 11.80 | NACL       |
| PERI | 44.8010 | 29.2745 | 0.30  | -0.45 | 0.09   | 0.09   | 13MAY17 | 12.29 | Geopontica |
| PET2 | 45.4164 | 23.3702 | 0.16  | -0.26 | 0.15   | 0.14   | 19AUG02 | 5.49  | NACL       |
| PGNL | 44.9196 | 26.9768 | -1.31 | -0.10 | 0.19   | 0.18   | 20JAN17 | 5.62  | NIEP       |
| PIRE | 44.8541 | 24.8787 | -0.42 | -0.59 | 0.16   | 0.14   | 18JAN03 | 7.39  | NACL       |

|      |         |         |       |       |      |      |         |       |            |
|------|---------|---------|-------|-------|------|------|---------|-------|------------|
| PLOI | 44.9338 | 25.9899 | -0.45 | -0.31 | 0.12 | 0.08 | 13JUL17 | 11.86 | NACLR      |
| PTNT | 46.9264 | 26.3664 | 0.14  | -0.27 | 0.09 | 0.09 | 13AUG01 | 11.82 | NACLR      |
| ROSP | 46.3169 | 23.1385 | 0.12  | -0.18 | 0.06 | 0.06 | 09JUL03 | 16.16 | NIEP       |
| ROSU | 45.4905 | 25.9439 | -0.21 | 0.67  | 0.09 | 0.09 | 12JUN28 | 13.17 | NIEP       |
| SATU | 47.7904 | 22.8693 | 0.08  | -0.12 | 0.09 | 0.07 | 13AUG07 | 11.80 | NACLR      |
| SFGH | 45.8664 | 25.7883 | 0.24  | 0.55  | 0.08 | 0.09 | 13JAN03 | 12.40 | NACLR      |
| SGHE | 44.8986 | 29.6007 | 0.19  | -0.89 | 0.18 | 0.20 | 13OCT18 | 11.87 | GeoPontica |
| SIB1 | 45.7817 | 24.1461 | -0.02 | -0.12 | 0.08 | 0.07 | 13AUG07 | 11.80 | NACLR      |
| SLOB | 44.5637 | 27.3657 | -0.38 | 0.14  | 0.13 | 0.12 | 14JAN17 | 11.36 | NACLR      |
| SLTN | 44.4227 | 24.3669 | -0.82 | -0.22 | 0.08 | 0.08 | 13AUG07 | 11.80 | NACLR      |
| SUCE | 47.6359 | 26.2370 | 0.83  | 0.09  | 0.09 | 0.07 | 13AUG07 | 11.80 | NACLR      |
| SULI | 45.1563 | 29.6546 | -0.39 | -0.17 | 0.16 | 0.14 | 18JAN19 | 7.35  | NACLR      |
| SULN | 45.1480 | 29.7588 | 0.25  | -0.13 | 0.08 | 0.08 | 13SEP05 | 11.98 | GeoPontica |
| TAJO | 44.3755 | 25.1740 | -0.05 | -0.29 | 0.11 | 0.10 | 14JAN02 | 11.40 | NACLR      |
| TBUJ | 45.8709 | 27.9127 | 0.41  | -0.40 | 0.09 | 0.08 | 13AUG07 | 11.80 | NACLR      |
| TECC | 45.8416 | 27.4089 | 0.22  | -0.30 | 0.18 | 0.15 | 19MAR14 | 6.46  | NIEP       |
| TGMS | 46.5283 | 24.5224 | 0.22  | 1.60  | 0.16 | 0.12 | 15NOV12 | 9.80  | NIEP       |
| TGTS | 46.4748 | 26.4897 | -0.91 | -0.42 | 0.08 | 0.07 | 09DEC16 | 15.00 | TopGeocart |
| TIM1 | 45.7799 | 21.2310 | 0.23  | 0.17  | 0.09 | 0.10 | 13AUG07 | 11.80 | NACLR      |
| TIMA | 45.1206 | 23.1278 | -0.34 | 0.02  | 0.10 | 0.09 | 13NOV22 | 11.77 | NIEP       |
| TIRG | 44.4573 | 28.4123 | 0.68  | -0.38 | 0.12 | 0.10 | 16JAN01 | 9.66  | NIEP       |
| TJIU | 45.0469 | 23.2739 | -0.86 | -0.84 | 0.09 | 0.06 | 13JAN05 | 12.39 | NACLR      |
| TPLT | 46.9263 | 25.3598 | 0.25  | -0.54 | 0.20 | 0.21 | 20OCT13 | 4.88  | NIEP       |
| TRGV | 44.9183 | 25.4657 | -0.60 | -0.85 | 0.09 | 0.10 | 13JAN03 | 12.39 | NACLR      |
| TUZL | 43.9902 | 28.6661 | 0.24  | 0.15  | 0.08 | 0.08 | 13MAY24 | 12.27 | GeoPontica |
| VAD2 | 45.3035 | 25.7222 | 0.14  | 0.56  | 0.23 | 0.21 | 19NOV07 | 5.55  | NACLR      |
| VAMO | 47.6516 | 25.5752 | 0.42  | -0.33 | 0.09 | 0.10 | 13FEB20 | 12.26 | NACLR      |
| VASL | 46.6416 | 27.7246 | 0.95  | 0.15  | 0.11 | 0.11 | 13AUG07 | 11.80 | NACLR      |
| VATR | 47.3177 | 25.3388 | -0.07 | 0.06  | 0.10 | 0.09 | 13AUG07 | 11.80 | NACLR      |
| VISE | 47.7082 | 24.4317 | 0.32  | -0.62 | 0.12 | 0.13 | 13AUG07 | 11.80 | NACLR      |
| VLC2 | 45.1074 | 24.3664 | 0.77  | -0.84 | 0.19 | 0.21 | 19AUG02 | 5.82  | NACLR      |
| VRAP | 45.8513 | 26.6498 | -0.12 | -0.26 | 0.05 | 0.05 | 04APR00 | 21.42 | NIEP       |
| ZALU | 47.1777 | 23.0618 | 0.17  | -0.34 | 0.08 | 0.08 | 13AUG07 | 11.80 | NACLR      |
| ZERI | 46.6252 | 21.5174 | -0.19 | 0.01  | 0.11 | 0.07 | 14SEP26 | 10.34 | NACLR      |

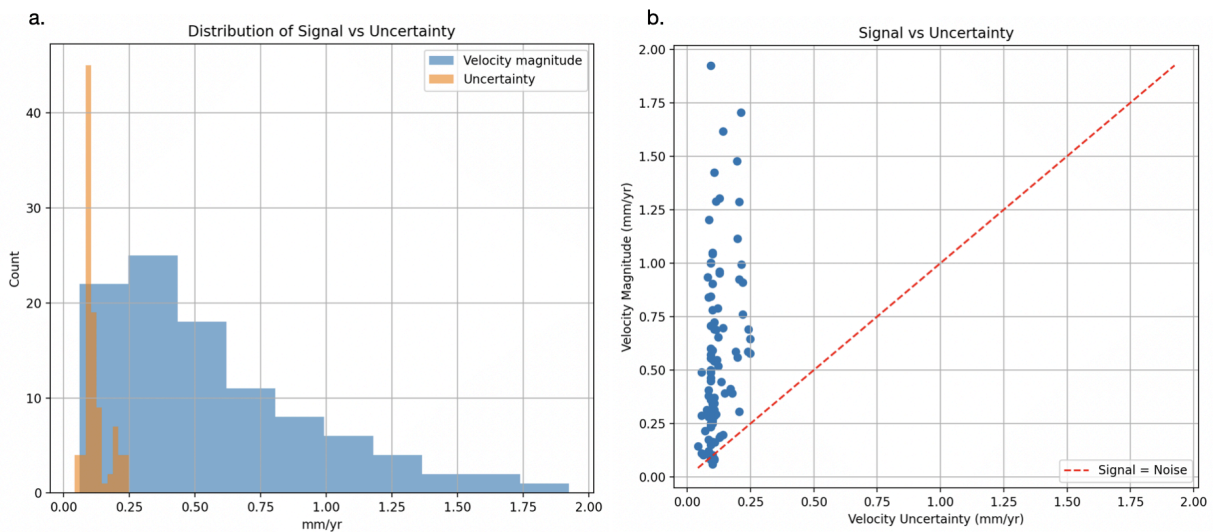

Figure S1: (a) Distribution of horizontal velocity magnitudes and their associated uncertainties. Velocity magnitudes are systematically larger than the corresponding uncertainties. (b) Comparison between horizontal velocity magnitudes and uncertainties. The red dashed line indicates a unit signal-to-noise ratio ( $V = \sigma$ ); most observations plot above this line, indicating that the velocities are well resolved relative to their uncertainties.

Table S2: Gridded horizontal velocity field

| LAT<br>deg | LON<br>deg | Vlat<br>mm/yr | Vlon<br>mm/yr | Node<br>-  |
|------------|------------|---------------|---------------|------------|
| 43.34      | 23.30      | -0.79         | 0.03          | Node002000 |
| 43.34      | 24.70      | -0.55         | 0.16          | Node003000 |
| 43.34      | 26.10      | -0.79         | 0.44          | Node004000 |
| 43.34      | 28.90      | 0.08          | 0.05          | Node006000 |
| 44.03      | 21.90      | -0.17         | 0.30          | Node001001 |
| 44.03      | 23.30      | -0.71         | -0.02         | Node002001 |
| 44.03      | 24.70      | -0.59         | -0.04         | Node003001 |
| 44.03      | 26.10      | -0.57         | 0.21          | Node004001 |
| 44.03      | 27.50      | -0.20         | 0.24          | Node005001 |
| 44.03      | 28.90      | 0.08          | 0.00          | Node006001 |
| 44.72      | 21.90      | -0.17         | 0.30          | Node001002 |
| 44.72      | 23.30      | -0.39         | -0.21         | Node002002 |
| 44.72      | 24.70      | -0.25         | -0.47         | Node003002 |
| 44.72      | 26.10      | -0.40         | -0.03         | Node004002 |
| 44.72      | 27.50      | -0.14         | 0.17          | Node005002 |
| 44.72      | 28.90      | 0.09          | -0.08         | Node006002 |
| 44.72      | 30.30      | -0.07         | -0.15         | Node007002 |
| 45.41      | 20.50      | 0.23          | 0.17          | Node000003 |
| 45.41      | 21.90      | 0.03          | -0.01         | Node001003 |
| 45.41      | 23.30      | -0.11         | -0.32         | Node002003 |
| 45.41      | 24.70      | 0.02          | -0.43         | Node003003 |
| 45.41      | 26.10      | -0.14         | 0.10          | Node004003 |
| 45.41      | 27.50      | 0.18          | -0.23         | Node005003 |
| 45.41      | 28.90      | 0.08          | -0.15         | Node006003 |
| 45.41      | 30.30      | -0.07         | -0.15         | Node007003 |
| 46.09      | 20.50      | 0.32          | 0.01          | Node000004 |
| 46.09      | 21.90      | 0.09          | 0.01          | Node001004 |
| 46.09      | 23.30      | 0.08          | -0.04         | Node002004 |
| 46.09      | 24.70      | -0.10         | -0.15         | Node003004 |
| 46.09      | 26.10      | -0.03         | 0.01          | Node004004 |
| 46.09      | 27.50      | 0.28          | -0.23         | Node005004 |
| 46.09      | 28.90      | 0.20          | -0.23         | Node006004 |
| 46.78      | 20.50      | 0.41          | -0.16         | Node000005 |
| 46.78      | 21.90      | 0.22          | 0.12          | Node001005 |
| 46.78      | 23.30      | 0.13          | -0.05         | Node002005 |
| 46.78      | 24.70      | -0.09         | -0.23         | Node003005 |
| 46.78      | 26.10      | 0.02          | -0.23         | Node004005 |
| 46.78      | 27.50      | 0.47          | -0.22         | Node005005 |
| 47.47      | 21.90      | 0.25          | 0.15          | Node001006 |
| 47.47      | 23.30      | 0.12          | -0.11         | Node002006 |
| 47.47      | 24.70      | 0.18          | -0.32         | Node003006 |
| 47.47      | 26.10      | 0.33          | -0.28         | Node004006 |
| 47.47      | 27.50      | 0.67          | -0.17         | Node005006 |
| 48.16      | 21.90      | 0.08          | -0.12         | Node001007 |
| 48.16      | 23.30      | -0.02         | -0.07         | Node002007 |
| 48.16      | 24.70      | 0.37          | -0.45         | Node003007 |
| 48.16      | 26.10      | 0.56          | -0.35         | Node004007 |

Table S3: Vertical velocities

| STAT<br>- | LAT<br>deg | LON<br>deg | Vrad<br>mm/yr | Sigrad<br>mm/yr | Tstart<br>date | Tspan<br>yrs | NETWORK<br>- |
|-----------|------------|------------|---------------|-----------------|----------------|--------------|--------------|
| ABIU      | 46.0777    | 23.5663    | -0.09         | 0.30            | 13FEB21        | 12.26        | NACLR        |
| ADCS      | 44.0882    | 27.9657    | 0.22          | 0.57            | 19MAY16        | 6.29         | NIEP         |
| ADJU      | 46.0954    | 27.1893    | 0.66          | 0.30            | 13JAN03        | 12.40        | NACLR        |
| AEGY      | 45.1864    | 28.8151    | 0.45          | 0.34            | 13NOV29        | 11.75        | GeoPontica   |
| AGIG      | 44.0866    | 28.6419    | 0.56          | 0.37            | 13JUN13        | 12.22        | GeoPontica   |
| ALXR      | 43.9699    | 25.3266    | -1.12         | 0.37            | 13JAN04        | 12.39        | NACLR        |
| ARAD      | 46.1732    | 21.3446    | -0.42         | 0.31            | 13JAN02        | 12.40        | NACLR        |
| ARYB      | 47.6180    | 25.2110    | 0.33          | 0.44            | 16JUN24        | 9.18         | NIEP         |

|       |         |         |       |      |         |       |            |
|-------|---------|---------|-------|------|---------|-------|------------|
| BABA  | 44.8841 | 28.7351 | 0.56  | 0.33 | 13JUN13 | 12.21 | GeoPontica |
| BACA  | 46.5621 | 26.9122 | -0.34 | 0.20 | 06JAN20 | 19.29 | NACLRL     |
| BAES  | 44.0292 | 23.3311 | -0.34 | 0.40 | 17APR20 | 8.36  | NIEP       |
| BAIA  | 47.6518 | 23.5577 | -0.33 | 0.19 | 06JAN20 | 19.35 | NACLRL     |
| BAIS  | 44.0223 | 23.3405 | -0.14 | 0.32 | 13JAN03 | 12.40 | NACLRL     |
| BANL  | 45.3828 | 21.1367 | 0.03  | 0.40 | 17APR28 | 8.34  | NIEP       |
| BEIU  | 46.6694 | 22.3514 | -0.00 | 0.38 | 13AUG07 | 10.48 | NACLRL     |
| BICA  | 46.8242 | 25.8514 | 1.90  | 0.54 | 16JAN01 | 9.66  | NIEP       |
| BIST  | 47.1289 | 24.4940 | 0.21  | 0.28 | 13JAN05 | 12.39 | NACLRL     |
| BORS  | 47.0903 | 21.7858 | -0.15 | 0.51 | 15NOV19 | 9.78  | NIEP       |
| BRAI  | 45.2677 | 27.9733 | -1.15 | 0.33 | 13AUG07 | 11.80 | NACLRL     |
| BRLD  | 46.2330 | 27.6443 | -0.31 | 0.57 | 19MAR14 | 6.47  | NIEP       |
| BUCE  | 45.4132 | 25.4703 | -0.05 | 0.26 | 02MAY15 | 22.38 | NIEP       |
| BUCU  | 44.4639 | 26.1257 | 0.48  | 0.35 | 14JAN02 | 11.40 | NACLRL     |
| BUZE  | 45.6191 | 21.6394 | 0.01  | 0.30 | 07JUL18 | 18.12 | NIEP       |
| CALR  | 44.2051 | 27.3134 | 0.16  | 0.30 | 13APR11 | 12.13 | NACLRL     |
| CAM1  | 46.3634 | 23.0497 | -0.44 | 0.32 | 13AUG07 | 11.80 | NACLRL     |
| CHIT  | 44.4941 | 28.8385 | -0.16 | 0.32 | 13MAY23 | 12.27 | GeoPontica |
| CIUC  | 46.3610 | 25.8015 | -0.19 | 0.34 | 13JAN03 | 12.39 | NACLRL     |
| CLU2  | 46.7725 | 23.6248 | -0.29 | 0.84 | 19OCT03 | 5.65  | NACLRL     |
| CONB  | 44.2138 | 28.6453 | -0.03 | 0.38 | 16JUN24 | 9.18  | NIEP       |
| CORA  | 43.7748 | 24.5022 | -0.09 | 0.40 | 13AUG07 | 11.80 | NACLRL     |
| COST  | 44.1615 | 28.6575 | 0.32  | 0.18 | 06JAN04 | 19.39 | NACLRL     |
| CRAI  | 44.3380 | 23.7645 | 0.21  | 0.34 | 13JAN25 | 12.33 | NACLRL     |
| CRCL  | 45.1781 | 28.1363 | -0.51 | 0.36 | 14JAN04 | 11.65 | NIEP       |
| CRNV  | 44.3421 | 28.0312 | 0.90  | 0.36 | 13AUG06 | 11.80 | NACLRL     |
| DEVA  | 45.8784 | 22.9135 | 0.41  | 0.27 | 09JAN02 | 16.40 | NACLRL     |
| DRTS  | 44.6272 | 22.6345 | 0.71  | 0.39 | 13AUG07 | 10.46 | NACLRL     |
| FAGA  | 45.8462 | 24.9687 | 0.53  | 0.34 | 13AUG07 | 11.80 | NACLRL     |
| FOCS  | 45.7083 | 27.1946 | -0.60 | 0.31 | 13JAN03 | 12.39 | NACLRL     |
| GHEL  | 46.7248 | 25.5984 | -0.22 | 0.29 | 13AUG07 | 11.80 | NACLRL     |
| GIUR  | 43.8863 | 25.9617 | 0.42  | 0.41 | 13JAN25 | 12.33 | NACLRL     |
| GPOR  | 44.6754 | 28.9872 | 0.41  | 0.36 | 13MAY16 | 12.29 | GeoPontica |
| GURA  | 46.2665 | 22.3378 | 0.27  | 0.39 | 13AUG07 | 11.80 | NACLRL     |
| HARI  | 44.6884 | 27.9574 | 1.49  | 0.59 | 13AUG07 | 11.80 | NACLRL     |
| HIST  | 44.5471 | 28.7702 | 0.40  | 0.18 | 03SEP08 | 21.98 | NIEP       |
| HUED  | 46.8653 | 23.0322 | 0.49  | 0.32 | 13FEB01 | 12.32 | NACLRL     |
| INSU  | 44.9112 | 27.6032 | 0.67  | 0.35 | 13JAN03 | 12.40 | NACLRL     |
| ISTR  | 44.5724 | 28.7113 | -0.11 | 0.31 | 13AUG07 | 11.80 | NACLRL     |
| LACP  | 45.8233 | 26.3753 | 0.29  | 0.38 | 04AUG11 | 21.05 | NIEP       |
| MAJA  | 47.0545 | 27.2530 | 0.52  | 0.35 | 13SEP06 | 11.98 | NIEP       |
| MEDS  | 46.1627 | 24.3469 | -1.47 | 0.33 | 13JAN26 | 12.33 | NACLRL     |
| MIDI  | 44.3462 | 28.6829 | 0.61  | 0.32 | 13MAY23 | 12.27 | GeoPontica |
| MNG2  | 43.8011 | 28.5953 | -0.21 | 0.29 | 13OCT24 | 11.85 | NIEP       |
| MNGA  | 43.8106 | 28.5586 | 0.40  | 0.32 | 13MAY22 | 11.93 | GeoPontica |
| MNGL  | 43.8093 | 28.5801 | 0.46  | 0.36 | 13FEB23 | 12.26 | NACLRL     |
| NEGR  | 46.8382 | 27.4420 | 0.19  | 0.81 | 20DEC10 | 4.72  | NIEP       |
| NEHU  | 45.4172 | 26.3023 | 0.23  | 0.30 | 13JAN26 | 12.33 | NACLRL     |
| ODO1  | 46.3070 | 25.2942 | 0.02  | 0.31 | 13AUG07 | 11.80 | NACLRL     |
| ORAD  | 47.0592 | 21.9416 | -1.49 | 0.35 | 13AUG07 | 11.80 | NACLRL     |
| PASC  | 47.2491 | 26.7387 | -0.34 | 0.33 | 13AUG07 | 11.80 | NACLRL     |
| PET2  | 45.4164 | 23.3702 | 1.45  | 0.82 | 19AUG02 | 5.82  | NACLRL     |
| PI TE | 44.8541 | 24.8787 | 1.37  | 0.36 | 14FEB27 | 11.24 | NACLRL     |
| PLOI  | 44.9338 | 25.9899 | -0.29 | 0.35 | 13JUL17 | 11.86 | NACLRL     |
| PTNT  | 46.9264 | 26.3664 | 0.81  | 0.33 | 13AUG01 | 11.82 | NACLRL     |
| RMSR  | 45.3906 | 27.0384 | 0.68  | 0.64 | 19FEB13 | 5.66  | NIEP       |
| ROSP  | 46.3169 | 23.1385 | 0.01  | 0.24 | 09JUL03 | 16.16 | NIEP       |
| ROSU  | 45.4905 | 25.9439 | -0.31 | 0.36 | 12JUN28 | 13.17 | NIEP       |
| SATU  | 47.7904 | 22.8693 | -0.43 | 0.33 | 13AUG07 | 11.80 | NACLRL     |
| SFGH  | 45.8664 | 25.7883 | -0.13 | 0.29 | 13JAN03 | 12.40 | NACLRL     |
| SIB1  | 45.7817 | 24.1461 | 0.60  | 0.33 | 13AUG07 | 11.80 | NACLRL     |
| SLOB  | 44.5637 | 27.3657 | -0.11 | 0.38 | 14JAN17 | 11.36 | NACLRL     |
| SLTN  | 44.4227 | 24.3669 | 0.05  | 0.36 | 13AUG07 | 11.80 | NACLRL     |
| STOL  | 44.5627 | 24.7897 | -0.46 | 0.62 | 17APR13 | 8.38  | NIEP       |
| SUCE  | 47.6359 | 26.2370 | 0.36  | 0.35 | 13AUG07 | 11.80 | NACLRL     |
| SULI  | 45.1563 | 29.6546 | -0.49 | 0.64 | 18JAN19 | 7.35  | NACLRL     |
| TAJU  | 44.3755 | 25.1740 | 0.16  | 0.34 | 14JAN02 | 11.40 | NACLRL     |
| TBUJ  | 45.8709 | 27.9127 | 0.44  | 0.31 | 13AUG07 | 11.80 | NACLRL     |
| TECC  | 45.8416 | 27.4089 | 0.55  | 0.62 | 19MAR14 | 6.46  | NIEP       |
| TGMS  | 46.5283 | 24.5224 | -0.85 | 0.41 | 15NOV12 | 9.80  | NIEP       |
| TGTS  | 46.4748 | 26.4897 | -0.66 | 0.26 | 09DEC16 | 15.00 | TopGeocart |

|      |         |         |       |      |         |       |            |
|------|---------|---------|-------|------|---------|-------|------------|
| TIM1 | 45.7799 | 21.2310 | -1.40 | 0.40 | 13AUG07 | 11.80 | NACLR      |
| TIMA | 45.1206 | 23.1278 | 0.20  | 0.35 | 13NOV22 | 11.77 | NIEP       |
| TIRG | 44.4573 | 28.4123 | 0.62  | 0.36 | 16JAN01 | 9.66  | NIEP       |
| TJIU | 45.0469 | 23.2739 | -0.91 | 0.31 | 13JAN05 | 12.39 | NACLR      |
| TOPG | 44.4477 | 26.1249 | 0.04  | 0.34 | 09MAY06 | 15.61 | TopGeocart |
| TPLT | 46.9263 | 25.3598 | 1.47  | 0.89 | 20OCT13 | 4.88  | NIEP       |
| TRGV | 44.9183 | 25.4657 | -0.42 | 0.33 | 13JAN03 | 12.39 | NACLR      |
| TUZL | 43.9902 | 28.6661 | 0.13  | 0.30 | 13MAY24 | 12.27 | GeoPontica |
| VAD2 | 45.3035 | 25.7222 | 1.58  | 0.74 | 19NOV07 | 5.55  | NACLR      |
| VAMO | 47.6516 | 25.5752 | 0.72  | 0.35 | 13FEB20 | 12.26 | NACLR      |
| VASL | 46.6416 | 27.7246 | -0.79 | 0.39 | 13AUG07 | 11.80 | NACLR      |
| VATR | 47.3177 | 25.3388 | 0.28  | 0.34 | 13AUG07 | 11.80 | NACLR      |
| VLC2 | 45.1074 | 24.3664 | 0.86  | 0.61 | 19AUG02 | 5.82  | NACLR      |
| VLDS | 45.8443 | 28.0808 | -1.30 | 0.46 | 15JAN22 | 9.65  | NIEP       |
| VRAP | 45.8513 | 26.6498 | 0.28  | 0.20 | 04APR00 | 21.42 | NIEP       |
| ZALU | 47.1777 | 23.0618 | -0.02 | 0.32 | 13AUG07 | 11.80 | NACLR      |

Table S4: Horizontal velocity inversion results and derived strain-rate parameters at selected locations. Each row lists geographic coordinates (latitude and longitude), inverted horizontal velocity components ( $v_x$ ,  $v_y$ ) and their uncertainties ( $dv_x$ ,  $dv_y$ ) in mm/yr; rotation rate ( $w$ ) in degrees per Myr; and principal strain-rate components ( $e_{xx}$ ,  $e_{xy}$ ,  $e_{yy}$ ) with uncertainties in nanostrain/year. Also included are the maximum and minimum principal strain rates ( $e_{max}$ ,  $e_{min}$ ), maximum shear strain rate ( $shr$ ), azimuth of maximum extension ( $azi$ ), dilatation rate ( $dilat$ ), and second invariant of the strain-rate tensor, all with associated uncertainties.

| Lat(°N) | Lon(°E) | $v_x$<br>mm/yr | $dv_x$<br>mm/yr | $v_y$<br>mm/yr | $dv_y$<br>mm/yr | $w$<br>deg/Myr | $dw$<br>deg/Myr | $e_{xx}$<br>nstrain/yr | $e_{dxx}$<br>nstrain/yr | $e_{xy}$<br>nstrain/yr | $e_{dexy}$<br>nstrain/yr | $e_{yy}$<br>nstrain/yr | $e_{deyy}$<br>nstrain/yr | $e_{max}$<br>nstrain/yr | $e_{demax}$<br>nstrain/yr | $e_{min}$<br>nstrain/yr | $e_{deminn}$<br>nstrain/yr | $shr$<br>nstrain/yr | $dshr$<br>nstrain/yr | $azi$<br>(deg) | $dazi$<br>(deg) | $dilat$<br>nstrain/yr | $ddilat$<br>nstrain/yr | sec.<br>invariant<br>nstrain/yr | dsec<br>inv<br>nstrain/yr |
|---------|---------|----------------|-----------------|----------------|-----------------|----------------|-----------------|------------------------|-------------------------|------------------------|--------------------------|------------------------|--------------------------|-------------------------|---------------------------|-------------------------|----------------------------|---------------------|----------------------|----------------|-----------------|-----------------------|------------------------|---------------------------------|---------------------------|
| 44.000  | 20.650  | 1.0            | 0.0             | -0.5           | 0.0             | 0.0            | 0.0             | -3.7                   | 0.4                     | -2.9                   | 0.3                      | 5.3                    | 0.4                      | 6.2                     | 0.4                       | -4.6                    | 0.4                        | 5.4                 | 0.3                  | 163.7          | 0.0             | 1.6                   | 0.6                    | 7.7                             | 0.4                       |
| 44.000  | 21.150  | 0.9            | 0.0             | -0.6           | 0.0             | 0.0            | 0.0             | -3.7                   | 0.3                     | -3.0                   | 0.3                      | 5.1                    | 0.5                      | 6.1                     | 0.4                       | -4.6                    | 0.4                        | 5.3                 | 0.3                  | 162.8          | 0.0             | 1.4                   | 0.6                    | 7.6                             | 0.4                       |
| 44.000  | 21.650  | 0.7            | 0.0             | -0.8           | 0.0             | -0.0           | 0.0             | -4.5                   | 0.5                     | -2.9                   | 0.4                      | 5.0                    | 0.7                      | 5.8                     | 0.7                       | -5.3                    | 0.5                        | 5.6                 | 0.4                  | 164.5          | 0.0             | 0.5                   | 0.8                    | 7.9                             | 0.6                       |
| 44.000  | 22.150  | 0.5            | 0.0             | -0.9           | 0.0             | -0.0           | 0.0             | -6.1                   | 0.6                     | -2.0                   | 0.5                      | 4.9                    | 0.9                      | 5.3                     | 0.9                       | -6.5                    | 0.6                        | 5.9                 | 0.5                  | 169.9          | 0.0             | -1.2                  | 1.1                    | 8.3                             | 0.7                       |
| 44.000  | 22.650  | 0.2            | 0.0             | -0.9           | 0.0             | -0.0           | 0.0             | -6.9                   | 0.6                     | -0.9                   | 0.6                      | 4.5                    | 0.9                      | 4.5                     | 0.9                       | -7.0                    | 0.6                        | 5.8                 | 0.6                  | 175.6          | 0.0             | -2.5                  | 1.1                    | 8.4                             | 0.7                       |
| 44.000  | 23.150  | 0.0            | 0.1             | -0.9           | 0.1             | -0.0           | 0.0             | -4.9                   | 0.8                     | 0.4                    | 0.8                      | 4.2                    | 1.3                      | 4.2                     | 1.3                       | -4.9                    | 0.8                        | 4.6                 | 0.8                  | 2.2            | 0.0             | -0.7                  | 1.5                    | 6.5                             | 1.0                       |
| 44.000  | 23.650  | -0.1           | 0.0             | -0.9           | 0.0             | -0.0           | 0.0             | -2.0                   | 0.7                     | 1.3                    | 0.7                      | 3.7                    | 1.1                      | 3.9                     | 1.1                       | -2.3                    | 0.7                        | 3.1                 | 0.7                  | 12.3           | 0.1             | 1.6                   | 1.3                    | 4.6                             | 1.0                       |
| 44.000  | 24.150  | -0.2           | 0.0             | -0.8           | 0.0             | -0.1           | 0.0             | -0.5                   | 0.5                     | 1.5                    | 0.4                      | 3.0                    | 0.7                      | 3.6                     | 0.7                       | -1.0                    | 0.5                        | 2.3                 | 0.4                  | 20.0           | 0.1             | 2.6                   | 0.8                    | 3.7                             | 0.7                       |
| 44.000  | 24.650  | -0.2           | 0.0             | -0.7           | 0.0             | -0.0           | 0.0             | 0.2                    | 0.5                     | 1.2                    | 0.4                      | 1.9                    | 0.6                      | 2.5                     | 0.6                       | -0.4                    | 0.5                        | 1.5                 | 0.4                  | 26.4           | 0.1             | 2.1                   | 0.8                    | 2.6                             | 0.6                       |
| 44.000  | 25.150  | -0.2           | 0.0             | -0.6           | 0.0             | -0.0           | 0.0             | 0.7                    | 0.3                     | 1.2                    | 0.3                      | 2.0                    | 0.5                      | 2.7                     | 0.4                       | -0.0                    | 0.4                        | 1.4                 | 0.3                  | 30.7           | 0.1             | 2.7                   | 0.6                    | 2.7                             | 0.4                       |
| 44.000  | 25.650  | -0.1           | 0.0             | -0.6           | 0.0             | -0.0           | 0.0             | 0.7                    | 0.2                     | 1.2                    | 0.2                      | 1.6                    | 0.4                      | 2.5                     | 0.4                       | -0.1                    | 0.3                        | 1.3                 | 0.2                  | 35.1           | 0.1             | 2.4                   | 0.5                    | 2.5                             | 0.4                       |
| 44.000  | 26.150  | -0.1           | 0.0             | -0.5           | 0.0             | -0.0           | 0.0             | 0.7                    | 0.2                     | 1.0                    | 0.2                      | 1.3                    | 0.4                      | 2.1                     | 0.4                       | -0.1                    | 0.3                        | 1.1                 | 0.2                  | 36.7           | 0.1             | 1.9                   | 0.5                    | 2.1                             | 0.4                       |
| 44.000  | 26.650  | -0.1           | 0.0             | -0.4           | 0.0             | -0.0           | 0.0             | 0.6                    | 0.2                     | 1.3                    | 0.2                      | 1.0                    | 0.4                      | 2.1                     | 0.4                       | -0.5                    | 0.3                        | 1.3                 | 0.2                  | 39.9           | 0.1             | 1.6                   | 0.5                    | 2.2                             | 0.4                       |
| 44.000  | 27.150  | -0.1           | 0.0             | -0.3           | 0.0             | -0.0           | 0.0             | 0.2                    | 0.3                     | 1.4                    | 0.3                      | 0.8                    | 0.4                      | 2.0                     | 0.4                       | -1.0                    | 0.3                        | 1.5                 | 0.3                  | 38.3           | 0.1             | 1.0                   | 0.5                    | 2.2                             | 0.4                       |
| 44.000  | 27.650  | -0.1           | 0.0             | -0.2           | 0.0             | -0.1           | 0.0             | -0.1                   | 0.3                     | 1.4                    | 0.2                      | 0.6                    | 0.4                      | 1.7                     | 0.4                       | -1.2                    | 0.3                        | 1.4                 | 0.2                  | 38.3           | 0.1             | 0.6                   | 0.5                    | 2.1                             | 0.3                       |
| 44.000  | 28.150  | -0.1           | 0.0             | -0.1           | 0.0             | -0.1           | 0.0             | -0.1                   | 0.3                     | 1.3                    | 0.2                      | 0.5                    | 0.3                      | 1.5                     | 0.3                       | -1.2                    | 0.3                        | 1.3                 | 0.2                  | 38.3           | 0.1             | 0.3                   | 0.4                    | 1.9                             | 0.3                       |

|        |        |      |     |      |     |      |     |      |     |      |     |     |     |     |     |      |     |     |     |       |     |      |     |     |     |
|--------|--------|------|-----|------|-----|------|-----|------|-----|------|-----|-----|-----|-----|-----|------|-----|-----|-----|-------|-----|------|-----|-----|-----|
| 44.000 | 28.650 | -0.1 | 0.0 | -0.0 | 0.0 | -0.1 | 0.0 | -0.2 | 0.3 | 1.0  | 0.2 | 0.2 | 0.4 | 1.0 | 0.3 | -1.0 | 0.4 | 1.0 | 0.2 | 39.6  | 0.1 | -0.1 | 0.5 | 1.4 | 0.3 |
| 44.500 | 20.650 | 0.9  | 0.0 | -0.2 | 0.0 | 0.0  | 0.0 | -4.2 | 0.5 | -3.1 | 0.3 | 4.6 | 0.4 | 5.6 | 0.4 | -5.2 | 0.5 | 5.4 | 0.3 | 162.3 | 0.0 | 0.4  | 0.7 | 7.6 | 0.5 |
| 44.500 | 21.150 | 0.7  | 0.0 | -0.4 | 0.0 | 0.0  | 0.0 | -4.2 | 0.4 | -3.0 | 0.3 | 4.7 | 0.4 | 5.6 | 0.4 | -5.1 | 0.4 | 5.4 | 0.3 | 162.8 | 0.0 | 0.5  | 0.6 | 7.6 | 0.4 |
| 44.500 | 21.650 | 0.5  | 0.0 | -0.5 | 0.0 | -0.0 | 0.0 | -4.5 | 0.4 | -2.7 | 0.3 | 4.7 | 0.5 | 5.5 | 0.5 | -5.2 | 0.4 | 5.3 | 0.3 | 164.6 | 0.0 | 0.2  | 0.6 | 7.6 | 0.5 |
| 44.500 | 22.150 | 0.4  | 0.0 | -0.6 | 0.0 | -0.0 | 0.0 | -4.9 | 0.5 | -2.0 | 0.4 | 4.8 | 0.5 | 5.1 | 0.5 | -5.3 | 0.5 | 5.2 | 0.4 | 168.9 | 0.0 | -0.2 | 0.7 | 7.4 | 0.5 |
| 44.500 | 22.650 | 0.2  | 0.0 | -0.6 | 0.0 | -0.0 | 0.0 | -5.0 | 0.6 | -0.9 | 0.4 | 4.7 | 0.6 | 4.8 | 0.6 | -5.1 | 0.6 | 4.9 | 0.4 | 174.6 | 0.0 | -0.3 | 0.8 | 7.0 | 0.6 |
| 44.500 | 23.150 | -0.0 | 0.0 | -0.7 | 0.0 | -0.0 | 0.0 | -3.8 | 0.6 | 0.1  | 0.5 | 4.6 | 0.7 | 4.6 | 0.7 | -3.8 | 0.6 | 4.2 | 0.5 | 0.7   | 0.0 | 0.8  | 0.9 | 6.0 | 0.6 |
| 44.500 | 23.650 | -0.1 | 0.0 | -0.6 | 0.0 | -0.0 | 0.0 | -2.1 | 0.6 | 0.8  | 0.4 | 4.1 | 0.6 | 4.2 | 0.6 | -2.2 | 0.6 | 3.2 | 0.4 | 7.3   | 0.0 | 2.0  | 0.9 | 4.8 | 0.6 |
| 44.500 | 24.150 | -0.2 | 0.0 | -0.6 | 0.0 | -0.0 | 0.0 | -0.7 | 0.5 | 1.1  | 0.4 | 3.4 | 0.5 | 3.7 | 0.5 | -1.0 | 0.5 | 2.3 | 0.4 | 13.8  | 0.0 | 2.7  | 0.7 | 3.8 | 0.5 |
| 44.500 | 24.650 | -0.2 | 0.0 | -0.6 | 0.0 | -0.0 | 0.0 | 0.6  | 0.5 | 0.9  | 0.4 | 3.1 | 0.6 | 3.4 | 0.6 | 0.3  | 0.6 | 1.6 | 0.4 | 18.2  | 0.1 | 3.7  | 0.8 | 3.4 | 0.6 |
| 44.500 | 25.150 | -0.1 | 0.0 | -0.5 | 0.0 | -0.0 | 0.0 | 0.9  | 0.4 | 1.0  | 0.3 | 2.4 | 0.4 | 2.9 | 0.4 | 0.4  | 0.4 | 1.2 | 0.3 | 26.4  | 0.1 | 3.3  | 0.6 | 2.9 | 0.4 |
| 44.500 | 25.650 | -0.1 | 0.0 | -0.5 | 0.0 | -0.0 | 0.0 | 0.8  | 0.3 | 1.0  | 0.3 | 2.0 | 0.4 | 2.6 | 0.4 | 0.3  | 0.4 | 1.2 | 0.3 | 29.6  | 0.1 | 2.8  | 0.5 | 2.6 | 0.4 |
| 44.500 | 26.150 | -0.1 | 0.0 | -0.5 | 0.0 | -0.0 | 0.0 | 0.9  | 0.5 | 1.2  | 0.4 | 1.9 | 0.7 | 2.7 | 0.6 | 0.1  | 0.5 | 1.3 | 0.4 | 34.5  | 0.2 | 2.8  | 0.8 | 2.7 | 0.6 |
| 44.500 | 26.650 | -0.1 | 0.0 | -0.3 | 0.0 | 0.0  | 0.0 | 0.3  | 0.4 | 1.0  | 0.3 | 1.4 | 0.5 | 2.0 | 0.5 | -0.3 | 0.4 | 1.1 | 0.3 | 31.5  | 0.1 | 1.7  | 0.6 | 2.0 | 0.5 |
| 44.500 | 27.150 | 0.0  | 0.0 | -0.3 | 0.0 | 0.0  | 0.0 | -0.2 | 0.4 | 1.1  | 0.3 | 1.1 | 0.4 | 1.7 | 0.4 | -0.9 | 0.4 | 1.3 | 0.3 | 30.0  | 0.1 | 0.8  | 0.6 | 2.0 | 0.4 |
| 44.500 | 27.650 | 0.0  | 0.0 | -0.2 | 0.0 | -0.1 | 0.0 | -0.6 | 0.4 | 1.3  | 0.3 | 0.8 | 0.4 | 1.6 | 0.4 | -1.4 | 0.4 | 1.5 | 0.3 | 30.9  | 0.1 | 0.2  | 0.6 | 2.2 | 0.4 |
| 44.500 | 28.150 | -0.1 | 0.0 | -0.1 | 0.0 | -0.1 | 0.0 | -0.5 | 0.4 | 1.1  | 0.3 | 0.6 | 0.4 | 1.3 | 0.4 | -1.3 | 0.4 | 1.3 | 0.3 | 32.1  | 0.1 | 0.1  | 0.5 | 1.8 | 0.4 |
| 44.500 | 28.650 | -0.1 | 0.0 | 0.0  | 0.0 | -0.1 | 0.0 | -0.5 | 0.4 | 0.8  | 0.3 | 0.3 | 0.4 | 0.8 | 0.4 | -1.0 | 0.4 | 0.9 | 0.3 | 32.9  | 0.2 | -0.2 | 0.6 | 1.3 | 0.4 |
| 44.500 | 29.150 | -0.1 | 0.0 | 0.0  | 0.0 | 0.0  | 0.0 | -0.4 | 0.3 | 0.3  | 0.2 | 0.0 | 0.3 | 0.1 | 0.2 | -0.6 | 0.4 | 0.4 | 0.2 | 28.5  | 0.3 | -0.5 | 0.4 | 0.6 | 0.4 |
| 45.000 | 20.650 | 0.7  | 0.0 | 0.0  | 0.0 | 0.0  | 0.0 | -4.2 | 0.9 | -3.3 | 0.5 | 3.6 | 0.6 | 4.8 | 0.7 | -5.4 | 0.8 | 5.1 | 0.5 | 159.7 | 0.0 | -0.6 | 1.1 | 7.3 | 0.8 |
| 45.000 | 21.150 | 0.5  | 0.0 | -0.1 | 0.0 | 0.0  | 0.0 | -3.8 | 0.7 | -3.1 | 0.4 | 3.8 | 0.6 | 4.9 | 0.6 | -5.0 | 0.6 | 4.9 | 0.4 | 160.2 | 0.0 | -0.1 | 0.9 | 7.0 | 0.6 |

|        |        |      |     |      |     |      |     |      |     |      |     |      |     |     |     |      |     |     |     |       |     |      |     |     |     |
|--------|--------|------|-----|------|-----|------|-----|------|-----|------|-----|------|-----|-----|-----|------|-----|-----|-----|-------|-----|------|-----|-----|-----|
| 45.000 | 21.650 | 0.4  | 0.0 | -0.2 | 0.0 | 0.0  | 0.0 | -3.8 | 0.5 | -2.6 | 0.4 | 4.1  | 0.5 | 4.9 | 0.5 | -4.6 | 0.5 | 4.7 | 0.4 | 163.4 | 0.0 | 0.3  | 0.8 | 6.7 | 0.5 |
| 45.000 | 22.150 | 0.2  | 0.0 | -0.3 | 0.0 | 0.0  | 0.0 | -3.8 | 0.5 | -1.8 | 0.3 | 4.6  | 0.5 | 4.9 | 0.5 | -4.2 | 0.5 | 4.6 | 0.3 | 168.2 | 0.0 | 0.8  | 0.7 | 6.5 | 0.5 |
| 45.000 | 22.650 | 0.1  | 0.0 | -0.4 | 0.0 | 0.0  | 0.0 | -3.4 | 0.5 | -1.0 | 0.3 | 4.4  | 0.5 | 4.6 | 0.5 | -3.5 | 0.5 | 4.0 | 0.3 | 172.6 | 0.0 | 1.1  | 0.7 | 5.8 | 0.5 |
| 45.000 | 23.150 | 0.0  | 0.0 | -0.4 | 0.0 | 0.0  | 0.0 | -2.7 | 0.5 | -0.4 | 0.4 | 4.3  | 0.5 | 4.4 | 0.5 | -2.7 | 0.5 | 3.5 | 0.4 | 177.2 | 0.0 | 1.6  | 0.7 | 5.1 | 0.5 |
| 45.000 | 23.650 | -0.1 | 0.0 | -0.4 | 0.0 | 0.0  | 0.0 | -1.6 | 0.5 | 0.3  | 0.3 | 3.9  | 0.5 | 3.9 | 0.5 | -1.6 | 0.5 | 2.8 | 0.3 | 3.5   | 0.0 | 2.3  | 0.7 | 4.2 | 0.5 |
| 45.000 | 24.150 | -0.1 | 0.0 | -0.4 | 0.0 | 0.0  | 0.0 | -0.4 | 0.5 | 0.7  | 0.3 | 3.4  | 0.5 | 3.5 | 0.5 | -0.5 | 0.5 | 2.0 | 0.3 | 10.1  | 0.0 | 3.0  | 0.6 | 3.5 | 0.5 |
| 45.000 | 24.650 | -0.1 | 0.0 | -0.4 | 0.0 | 0.0  | 0.0 | 0.9  | 0.5 | 0.8  | 0.3 | 3.1  | 0.5 | 3.4 | 0.5 | 0.6  | 0.5 | 1.4 | 0.3 | 17.2  | 0.1 | 4.0  | 0.7 | 3.4 | 0.5 |
| 45.000 | 25.150 | -0.1 | 0.0 | -0.4 | 0.0 | 0.0  | 0.0 | 1.1  | 0.4 | 0.6  | 0.3 | 2.7  | 0.4 | 2.9 | 0.4 | 0.9  | 0.4 | 1.0 | 0.3 | 19.6  | 0.1 | 3.8  | 0.6 | 3.0 | 0.4 |
| 45.000 | 25.650 | 0.0  | 0.0 | -0.4 | 0.0 | 0.0  | 0.0 | 1.0  | 0.5 | 0.8  | 0.3 | 2.5  | 0.5 | 2.8 | 0.5 | 0.6  | 0.5 | 1.1 | 0.3 | 23.8  | 0.1 | 3.5  | 0.7 | 2.9 | 0.5 |
| 45.000 | 26.150 | 0.0  | 0.0 | -0.3 | 0.0 | 0.0  | 0.0 | 0.4  | 0.6 | 0.9  | 0.4 | 2.3  | 0.6 | 2.7 | 0.6 | 0.1  | 0.6 | 1.3 | 0.4 | 21.5  | 0.1 | 2.8  | 0.9 | 2.7 | 0.6 |
| 45.000 | 26.650 | 0.0  | 0.0 | -0.3 | 0.0 | 0.0  | 0.0 | -0.4 | 0.5 | 0.8  | 0.4 | 2.0  | 0.6 | 2.3 | 0.6 | -0.7 | 0.5 | 1.5 | 0.4 | 17.3  | 0.1 | 1.6  | 0.8 | 2.4 | 0.5 |
| 45.000 | 27.150 | -0.1 | 0.0 | -0.2 | 0.0 | -0.1 | 0.0 | -0.8 | 0.5 | 0.7  | 0.4 | 1.8  | 0.5 | 1.9 | 0.5 | -1.0 | 0.5 | 1.5 | 0.4 | 15.1  | 0.1 | 1.0  | 0.7 | 2.2 | 0.5 |
| 45.000 | 27.650 | -0.1 | 0.0 | -0.2 | 0.0 | -0.1 | 0.0 | -0.5 | 0.5 | 0.6  | 0.3 | 1.3  | 0.5 | 1.5 | 0.5 | -0.7 | 0.5 | 1.1 | 0.3 | 17.8  | 0.1 | 0.7  | 0.7 | 1.7 | 0.5 |
| 45.000 | 28.150 | -0.1 | 0.0 | -0.1 | 0.0 | -0.1 | 0.0 | -0.5 | 0.5 | 0.6  | 0.3 | 0.7  | 0.4 | 0.9 | 0.4 | -0.7 | 0.5 | 0.8 | 0.3 | 22.7  | 0.2 | 0.2  | 0.6 | 1.2 | 0.4 |
| 45.000 | 28.650 | -0.1 | 0.0 | 0.0  | 0.0 | -0.1 | 0.0 | -0.2 | 0.5 | 0.3  | 0.3 | 0.2  | 0.5 | 0.4 | 0.5 | -0.4 | 0.5 | 0.4 | 0.3 | 27.8  | 0.4 | 0.0  | 0.7 | 0.5 | 0.5 |
| 45.000 | 29.150 | -0.1 | 0.0 | 0.0  | 0.0 | 0.0  | 0.0 | -0.3 | 0.3 | 0.1  | 0.2 | 0.0  | 0.4 | 0.1 | 0.3 | -0.3 | 0.3 | 0.2 | 0.2 | 16.5  | 0.4 | -0.3 | 0.5 | 0.4 | 0.3 |
| 45.000 | 29.650 | -0.1 | 0.0 | 0.0  | 0.0 | 0.0  | 0.0 | -0.4 | 0.3 | 0.1  | 0.2 | -0.1 | 0.3 | 0.0 | 0.3 | -0.5 | 0.3 | 0.2 | 0.2 | 13.4  | 0.3 | -0.5 | 0.5 | 0.5 | 0.3 |
| 45.500 | 20.650 | 0.3  | 0.0 | 0.1  | 0.0 | -0.1 | 0.0 | -2.4 | 1.3 | -3.7 | 0.8 | 2.1  | 0.9 | 4.2 | 1.1 | -4.5 | 1.2 | 4.4 | 0.8 | 150.6 | 0.1 | -0.3 | 1.6 | 6.2 | 1.1 |
| 45.500 | 21.150 | 0.3  | 0.0 | 0.0  | 0.0 | -0.1 | 0.0 | -2.3 | 0.8 | -2.9 | 0.5 | 2.3  | 0.7 | 3.8 | 0.7 | -3.7 | 0.8 | 3.7 | 0.5 | 154.1 | 0.1 | 0.0  | 1.1 | 5.3 | 0.8 |
| 45.500 | 21.650 | 0.2  | 0.0 | -0.1 | 0.0 | 0.0  | 0.0 | -2.4 | 0.5 | -2.2 | 0.4 | 2.9  | 0.6 | 3.7 | 0.6 | -3.2 | 0.5 | 3.5 | 0.4 | 160.0 | 0.0 | 0.5  | 0.8 | 4.9 | 0.6 |
| 45.500 | 22.150 | 0.1  | 0.0 | -0.1 | 0.0 | 0.0  | 0.0 | -2.2 | 0.5 | -1.6 | 0.4 | 3.6  | 0.6 | 4.0 | 0.6 | -2.6 | 0.5 | 3.3 | 0.4 | 165.9 | 0.0 | 1.3  | 0.8 | 4.7 | 0.5 |

|        |        |      |     |      |     |      |     |      |     |      |     |     |     |     |     |      |     |     |     |       |     |      |     |     |     |
|--------|--------|------|-----|------|-----|------|-----|------|-----|------|-----|-----|-----|-----|-----|------|-----|-----|-----|-------|-----|------|-----|-----|-----|
| 45.500 | 22.650 | 0.0  | 0.0 | -0.2 | 0.0 | 0.0  | 0.0 | -2.0 | 0.5 | -0.9 | 0.3 | 3.5 | 0.5 | 3.7 | 0.5 | -2.2 | 0.5 | 2.9 | 0.3 | 171.0 | 0.0 | 1.5  | 0.7 | 4.3 | 0.5 |
| 45.500 | 23.150 | 0.0  | 0.0 | -0.2 | 0.0 | 0.0  | 0.0 | -1.4 | 0.4 | -0.3 | 0.3 | 3.1 | 0.5 | 3.1 | 0.5 | -1.4 | 0.4 | 2.2 | 0.3 | 176.6 | 0.0 | 1.7  | 0.6 | 3.4 | 0.5 |
| 45.500 | 23.650 | -0.1 | 0.0 | -0.2 | 0.0 | 0.0  | 0.0 | -0.7 | 0.4 | 0.1  | 0.3 | 3.0 | 0.4 | 3.0 | 0.4 | -0.7 | 0.4 | 1.9 | 0.3 | 1.7   | 0.0 | 2.3  | 0.6 | 3.1 | 0.4 |
| 45.500 | 24.150 | -0.1 | 0.0 | -0.2 | 0.0 | 0.0  | 0.0 | 0.2  | 0.4 | 0.5  | 0.3 | 2.8 | 0.4 | 2.8 | 0.4 | 0.1  | 0.4 | 1.4 | 0.3 | 9.8   | 0.1 | 2.9  | 0.6 | 2.8 | 0.4 |
| 45.500 | 24.650 | -0.1 | 0.0 | -0.2 | 0.0 | 0.0  | 0.0 | 0.6  | 0.4 | 0.4  | 0.3 | 2.5 | 0.4 | 2.6 | 0.4 | 0.5  | 0.4 | 1.1 | 0.3 | 11.7  | 0.1 | 3.1  | 0.6 | 2.7 | 0.4 |
| 45.500 | 25.150 | -0.1 | 0.0 | -0.3 | 0.0 | 0.0  | 0.0 | 0.8  | 0.4 | 0.4  | 0.3 | 2.3 | 0.4 | 2.4 | 0.4 | 0.7  | 0.4 | 0.8 | 0.3 | 15.4  | 0.1 | 3.1  | 0.6 | 2.5 | 0.4 |
| 45.500 | 25.650 | 0.0  | 0.0 | -0.2 | 0.0 | 0.0  | 0.0 | 0.4  | 0.5 | 0.4  | 0.3 | 2.2 | 0.5 | 2.3 | 0.5 | 0.3  | 0.5 | 1.0 | 0.3 | 12.8  | 0.1 | 2.6  | 0.7 | 2.4 | 0.5 |
| 45.500 | 26.150 | 0.0  | 0.0 | -0.2 | 0.0 | 0.0  | 0.0 | -0.6 | 0.6 | 0.4  | 0.4 | 2.3 | 0.6 | 2.3 | 0.6 | -0.6 | 0.6 | 1.5 | 0.4 | 6.9   | 0.1 | 1.7  | 0.8 | 2.4 | 0.6 |
| 45.500 | 26.650 | -0.1 | 0.0 | -0.2 | 0.0 | -0.1 | 0.0 | -1.3 | 0.6 | 0.2  | 0.4 | 2.3 | 0.6 | 2.3 | 0.6 | -1.3 | 0.6 | 1.8 | 0.4 | 2.9   | 0.1 | 1.0  | 0.8 | 2.7 | 0.6 |
| 45.500 | 27.150 | -0.2 | 0.0 | -0.1 | 0.0 | -0.1 | 0.0 | -1.2 | 0.5 | 0.0  | 0.4 | 2.1 | 0.5 | 2.1 | 0.5 | -1.2 | 0.5 | 1.7 | 0.4 | 0.4   | 0.1 | 0.9  | 0.8 | 2.4 | 0.5 |
| 45.500 | 27.650 | -0.1 | 0.0 | -0.1 | 0.0 | -0.1 | 0.0 | -0.7 | 0.5 | -0.1 | 0.4 | 1.6 | 0.6 | 1.6 | 0.5 | -0.7 | 0.5 | 1.2 | 0.4 | 176.8 | 0.1 | 0.9  | 0.7 | 1.8 | 0.5 |
| 45.500 | 28.150 | -0.1 | 0.0 | 0.0  | 0.0 | -0.1 | 0.0 | -0.4 | 0.5 | -0.1 | 0.4 | 1.1 | 0.5 | 1.1 | 0.5 | -0.4 | 0.5 | 0.7 | 0.4 | 176.8 | 0.1 | 0.7  | 0.7 | 1.2 | 0.5 |
| 45.500 | 28.650 | -0.1 | 0.0 | 0.0  | 0.0 | 0.0  | 0.0 | -0.2 | 0.5 | -0.1 | 0.4 | 0.7 | 0.6 | 0.7 | 0.5 | -0.2 | 0.5 | 0.5 | 0.4 | 175.2 | 0.2 | 0.6  | 0.7 | 0.8 | 0.5 |
| 45.500 | 29.150 | -0.2 | 0.0 | 0.0  | 0.0 | 0.0  | 0.0 | -0.4 | 0.3 | 0.0  | 0.2 | 0.8 | 0.4 | 0.8 | 0.4 | -0.4 | 0.3 | 0.6 | 0.2 | 177.8 | 0.1 | 0.4  | 0.4 | 0.9 | 0.3 |
| 45.500 | 29.650 | -0.2 | 0.0 | 0.1  | 0.0 | 0.0  | 0.0 | -0.3 | 0.3 | -0.2 | 0.2 | 0.6 | 0.3 | 0.7 | 0.3 | -0.3 | 0.3 | 0.5 | 0.2 | 170.8 | 0.1 | 0.3  | 0.4 | 0.7 | 0.3 |
| 46.000 | 20.650 | 0.1  | 0.0 | 0.2  | 0.0 | 0.0  | 0.0 | -1.1 | 0.9 | -1.3 | 0.6 | 1.2 | 0.8 | 1.8 | 0.9 | -1.7 | 0.9 | 1.8 | 0.6 | 156.1 | 0.1 | 0.1  | 1.3 | 2.5 | 0.9 |
| 46.000 | 21.150 | 0.1  | 0.0 | 0.1  | 0.0 | 0.0  | 0.0 | -1.1 | 0.8 | -1.9 | 0.5 | 1.1 | 0.7 | 2.2 | 0.7 | -2.2 | 0.7 | 2.2 | 0.5 | 150.1 | 0.1 | 0.0  | 1.0 | 3.1 | 0.7 |
| 46.000 | 21.650 | 0.1  | 0.0 | 0.1  | 0.0 | 0.0  | 0.0 | -1.2 | 0.6 | -1.4 | 0.5 | 1.1 | 0.7 | 1.8 | 0.7 | -1.9 | 0.6 | 1.8 | 0.5 | 154.1 | 0.1 | -0.1 | 0.9 | 2.6 | 0.6 |
| 46.000 | 22.150 | 0.0  | 0.0 | 0.0  | 0.0 | 0.0  | 0.0 | -1.1 | 0.5 | -1.2 | 0.4 | 1.5 | 0.6 | 2.0 | 0.6 | -1.5 | 0.5 | 1.7 | 0.4 | 159.3 | 0.1 | 0.4  | 0.8 | 2.5 | 0.6 |
| 46.000 | 22.650 | 0.0  | 0.0 | -0.1 | 0.0 | 0.0  | 0.0 | -0.7 | 0.6 | -0.7 | 0.4 | 1.6 | 0.6 | 1.8 | 0.6 | -0.9 | 0.6 | 1.4 | 0.4 | 165.6 | 0.1 | 0.9  | 0.8 | 2.0 | 0.6 |
| 46.000 | 23.150 | 0.0  | 0.0 | -0.1 | 0.0 | 0.0  | 0.0 | -0.4 | 0.5 | -0.2 | 0.3 | 1.8 | 0.5 | 1.8 | 0.5 | -0.4 | 0.5 | 1.1 | 0.3 | 175.7 | 0.1 | 1.4  | 0.7 | 1.9 | 0.5 |

|        |        |      |     |      |     |      |     |      |     |      |     |      |     |      |     |      |     |     |     |       |     |      |     |     |     |
|--------|--------|------|-----|------|-----|------|-----|------|-----|------|-----|------|-----|------|-----|------|-----|-----|-----|-------|-----|------|-----|-----|-----|
| 46.000 | 23.650 | 0.0  | 0.0 | -0.1 | 0.0 | 0.0  | 0.0 | -0.1 | 0.4 | 0.0  | 0.3 | 2.0  | 0.4 | 2.0  | 0.4 | -0.1 | 0.4 | 1.1 | 0.3 | 0.7   | 0.1 | 1.9  | 0.6 | 2.0 | 0.4 |
| 46.000 | 24.150 | 0.0  | 0.0 | -0.1 | 0.0 | 0.0  | 0.0 | +0.3 | 0.4 | 0.1  | 0.3 | 2.1  | 0.4 | 2.1  | 0.4 | 0.3  | 0.4 | 0.9 | 0.3 | 2.2   | 0.1 | 2.4  | 0.5 | 2.1 | 0.4 |
| 46.000 | 24.650 | 0.0  | 0.0 | -0.1 | 0.0 | 0.0  | 0.0 | +0.2 | 0.4 | 0.0  | 0.3 | 2.2  | 0.4 | 2.2  | 0.4 | 0.2  | 0.4 | 1.0 | 0.3 | 0.7   | 0.1 | 2.4  | 0.5 | 2.2 | 0.4 |
| 46.000 | 25.150 | 0.0  | 0.0 | -0.1 | 0.0 | 0.0  | 0.0 | 0.0  | 0.4 | 0.0  | 0.3 | 2.0  | 0.5 | 2.0  | 0.5 | 0.0  | 0.4 | 1.0 | 0.3 | 0.5   | 0.1 | 2.0  | 0.6 | 2.0 | 0.5 |
| 46.000 | 25.650 | -0.1 | 0.0 | -0.1 | 0.0 | 0.0  | 0.0 | -0.6 | 0.4 | 0.2  | 0.3 | 2.0  | 0.5 | 2.0  | 0.5 | -0.6 | 0.4 | 1.3 | 0.3 | 3.6   | 0.1 | 1.4  | 0.6 | 2.1 | 0.5 |
| 46.000 | 26.150 | -0.1 | 0.0 | -0.1 | 0.0 | -0.1 | 0.0 | -1.0 | 0.5 | 0.1  | 0.4 | 2.1  | 0.5 | 2.1  | 0.5 | -1.0 | 0.5 | 1.6 | 0.4 | 1.4   | 0.1 | 1.1  | 0.7 | 2.4 | 0.5 |
| 46.000 | 26.650 | -0.1 | 0.0 | 0.0  | 0.0 | -0.1 | 0.0 | -1.5 | 0.5 | 0.0  | 0.3 | 2.3  | 0.5 | 2.3  | 0.5 | -1.5 | 0.5 | 1.9 | 0.3 | 179.8 | 0.0 | 0.8  | 0.7 | 2.7 | 0.5 |
| 46.000 | 27.150 | -0.2 | 0.0 | 0.0  | 0.0 | -0.1 | 0.0 | -1.5 | 0.5 | -0.3 | 0.4 | 2.3  | 0.5 | 2.3  | 0.5 | -1.6 | 0.6 | 1.9 | 0.4 | 175.6 | 0.1 | 0.7  | 0.8 | 2.8 | 0.5 |
| 46.000 | 27.650 | -0.2 | 0.0 | 0.0  | 0.0 | -0.1 | 0.0 | -0.8 | 0.5 | -0.2 | 0.3 | 1.8  | 0.5 | 1.8  | 0.5 | -0.8 | 0.5 | 1.3 | 0.3 | 176.5 | 0.1 | 1.0  | 0.7 | 1.9 | 0.5 |
| 46.000 | 28.150 | -0.2 | 0.0 | 0.1  | 0.0 | 0.0  | 0.0 | -0.5 | 0.3 | 0.1  | 0.2 | 1.5  | 0.3 | 1.5  | 0.3 | -0.5 | 0.3 | 1.0 | 0.2 | 3.2   | 0.1 | 1.1  | 0.5 | 1.6 | 0.3 |
| 46.000 | 28.650 | -0.2 | 0.0 | 0.1  | 0.0 | 0.0  | 0.0 | -0.4 | 0.3 | 0.1  | 0.2 | 1.5  | 0.3 | 1.5  | 0.3 | -0.4 | 0.3 | 0.9 | 0.2 | 1.7   | 0.1 | 1.1  | 0.5 | 1.5 | 0.3 |
| 46.000 | 29.150 | -0.2 | 0.0 | 0.1  | 0.0 | 0.0  | 0.0 | -0.4 | 0.3 | 0.0  | 0.2 | 1.3  | 0.3 | 1.3  | 0.3 | -0.4 | 0.3 | 0.8 | 0.2 | 1.2   | 0.1 | 0.9  | 0.4 | 1.3 | 0.3 |
| 46.500 | 21.150 | 0.0  | 0.0 | 0.1  | 0.0 | 0.0  | 0.0 | -0.9 | 0.6 | -1.3 | 0.4 | -0.9 | 0.6 | 0.4  | 0.7 | -2.2 | 0.5 | 1.3 | 0.4 | 135.1 | 0.2 | -1.9 | 0.9 | 2.3 | 0.5 |
| 46.500 | 21.650 | 0.0  | 0.0 | 0.0  | 0.0 | 0.0  | 0.0 | -0.9 | 0.6 | -1.0 | 0.4 | -1.2 | 0.6 | -0.1 | 0.7 | -2.0 | 0.5 | 1.0 | 0.4 | 129.8 | 0.2 | -2.1 | 0.8 | 2.0 | 0.5 |
| 46.500 | 22.150 | 0.0  | 0.0 | 0.0  | 0.0 | 0.0  | 0.0 | -0.6 | 0.6 | -0.6 | 0.4 | -1.4 | 0.6 | -0.3 | 0.6 | -1.7 | 0.6 | 0.7 | 0.4 | 118.7 | 0.3 | -2.1 | 0.9 | 1.8 | 0.6 |
| 46.500 | 22.650 | 0.0  | 0.0 | 0.0  | 0.0 | 0.0  | 0.0 | -0.1 | 0.6 | -0.1 | 0.4 | -0.5 | 0.6 | -0.1 | 0.6 | -0.6 | 0.6 | 0.2 | 0.4 | 99.6  | 0.5 | -0.6 | 0.8 | 0.6 | 0.6 |
| 46.500 | 23.150 | 0.0  | 0.0 | 0.0  | 0.0 | 0.0  | 0.0 | 0.1  | 0.5 | 0.0  | 0.4 | 0.2  | 0.5 | 0.2  | 0.5 | +0.1 | 0.5 | 0.1 | 0.4 | 163.0 | 2.0 | 0.3  | 0.7 | 0.2 | 0.5 |
| 46.500 | 23.650 | -0.1 | 0.0 | 0.0  | 0.0 | 0.0  | 0.0 | 0.0  | 0.5 | -0.1 | 0.3 | 1.0  | 0.5 | 1.1  | 0.5 | 0.0  | 0.5 | 0.6 | 0.3 | 173.1 | 0.2 | 1.0  | 0.7 | 1.1 | 0.5 |
| 46.500 | 24.150 | -0.1 | 0.0 | 0.0  | 0.0 | 0.0  | 0.0 | -0.1 | 0.4 | -0.3 | 0.3 | 1.4  | 0.4 | 1.5  | 0.4 | -0.1 | 0.4 | 0.8 | 0.3 | 168.5 | 0.1 | 1.3  | 0.6 | 1.5 | 0.4 |
| 46.500 | 24.650 | 0.0  | 0.0 | 0.0  | 0.0 | 0.0  | 0.0 | -0.1 | 0.4 | -0.3 | 0.3 | 1.8  | 0.5 | 1.8  | 0.5 | -0.1 | 0.4 | 1.0 | 0.3 | 170.9 | 0.1 | 1.7  | 0.6 | 1.8 | 0.5 |
| 46.500 | 25.150 | 0.0  | 0.0 | 0.0  | 0.0 | 0.0  | 0.0 | -0.7 | 0.4 | -0.3 | 0.3 | 2.0  | 0.5 | 2.0  | 0.5 | -0.7 | 0.4 | 1.4 | 0.3 | 174.3 | 0.1 | 1.3  | 0.6 | 2.1 | 0.5 |

|        |        |      |     |      |     |      |     |      |     |      |     |      |     |      |     |      |     |     |     |       |     |      |     |     |     |
|--------|--------|------|-----|------|-----|------|-----|------|-----|------|-----|------|-----|------|-----|------|-----|-----|-----|-------|-----|------|-----|-----|-----|
| 46.500 | 25.650 | -0.1 | 0.0 | 0.0  | 0.0 | -0.1 | 0.0 | -1.0 | 0.4 | -0.2 | 0.3 | 2.1  | 0.4 | 2.1  | 0.4 | -1.0 | 0.4 | 1.6 | 0.3 | 176.0 | 0.0 | 1.1  | 0.6 | 2.3 | 0.4 |
| 46.500 | 26.150 | -0.1 | 0.0 | 0.0  | 0.0 | -0.1 | 0.0 | -1.3 | 0.4 | 0.3  | 0.3 | 1.9  | 0.4 | 2.0  | 0.4 | -1.3 | 0.4 | 1.6 | 0.3 | 5.5   | 0.0 | 0.7  | 0.6 | 2.4 | 0.4 |
| 46.500 | 26.650 | -0.2 | 0.0 | 0.1  | 0.0 | -0.1 | 0.0 | -1.7 | 0.5 | 0.4  | 0.4 | 2.1  | 0.5 | 2.2  | 0.5 | -1.7 | 0.5 | 1.9 | 0.4 | 5.3   | 0.1 | 0.5  | 0.8 | 2.8 | 0.5 |
| 46.500 | 27.150 | -0.2 | 0.0 | 0.1  | 0.0 | -0.1 | 0.0 | -1.0 | 0.6 | 0.3  | 0.4 | 2.3  | 0.5 | 2.3  | 0.5 | -1.1 | 0.5 | 1.7 | 0.4 | 4.8   | 0.1 | 1.3  | 0.7 | 2.6 | 0.5 |
| 46.500 | 27.650 | -0.2 | 0.0 | 0.1  | 0.0 | 0.0  | 0.0 | -0.3 | 0.5 | 0.0  | 0.3 | 1.6  | 0.4 | 1.6  | 0.4 | -0.3 | 0.5 | 0.9 | 0.3 | 0.4   | 0.1 | 1.3  | 0.7 | 1.6 | 0.4 |
| 46.500 | 28.150 | -0.2 | 0.0 | 0.1  | 0.0 | 0.0  | 0.0 | -0.5 | 0.4 | 0.1  | 0.2 | 1.5  | 0.3 | 1.5  | 0.3 | -0.5 | 0.4 | 1.0 | 0.2 | 2.9   | 0.1 | 1.0  | 0.5 | 1.6 | 0.3 |
| 46.500 | 28.650 | -0.2 | 0.0 | 0.2  | 0.0 | 0.0  | 0.0 | -0.3 | 0.4 | 0.1  | 0.2 | 1.4  | 0.3 | 1.4  | 0.3 | -0.3 | 0.3 | 0.9 | 0.2 | 2.8   | 0.1 | 1.1  | 0.5 | 1.5 | 0.3 |
| 47.000 | 21.650 | -0.0 | 0.0 | -0.1 | 0.0 | 0.0  | 0.0 | -0.9 | 0.6 | -0.5 | 0.4 | -2.2 | 0.5 | -0.7 | 0.7 | -2.4 | 0.5 | 0.8 | 0.4 | 109.8 | 0.2 | -3.1 | 0.8 | 2.5 | 0.5 |
| 47.000 | 22.150 | -0.1 | 0.0 | -0.2 | 0.0 | -0.1 | 0.0 | -0.3 | 0.7 | 0.7  | 0.5 | -1.6 | 0.6 | 0.0  | 0.7 | -1.9 | 0.6 | 1.0 | 0.5 | 65.1  | 0.2 | -1.9 | 0.9 | 1.9 | 0.6 |
| 47.000 | 22.650 | -0.1 | 0.0 | -0.1 | 0.0 | -0.1 | 0.0 | -0.2 | 0.6 | 0.6  | 0.4 | -1.2 | 0.6 | 0.0  | 0.6 | -1.4 | 0.6 | 0.7 | 0.4 | 65.1  | 0.2 | -1.4 | 0.8 | 1.4 | 0.6 |
| 47.000 | 23.150 | -0.1 | 0.0 | 0.0  | 0.0 | -0.1 | 0.0 | -0.1 | 0.5 | 0.1  | 0.4 | -0.7 | 0.6 | -0.1 | 0.5 | -0.8 | 0.6 | 0.3 | 0.4 | 79.5  | 0.4 | -0.9 | 0.8 | 0.8 | 0.6 |
| 47.000 | 23.650 | -0.1 | 0.0 | 0.0  | 0.0 | -0.1 | 0.0 | -0.1 | 0.5 | -0.4 | 0.4 | 0.4  | 0.5 | 0.6  | 0.5 | -0.3 | 0.5 | 0.4 | 0.4 | 151.0 | 0.4 | 0.2  | 0.7 | 0.6 | 0.5 |
| 47.000 | 24.150 | -0.1 | 0.0 | 0.0  | 0.0 | -0.1 | 0.0 | -0.2 | 0.5 | -0.6 | 0.4 | 1.2  | 0.5 | 1.4  | 0.5 | -0.5 | 0.5 | 1.0 | 0.4 | 159.2 | 0.1 | 1.0  | 0.7 | 1.5 | 0.5 |
| 47.000 | 24.650 | -0.1 | 0.0 | 0.1  | 0.0 | -0.1 | 0.0 | -0.4 | 0.5 | -0.7 | 0.3 | 1.7  | 0.5 | 1.9  | 0.5 | -0.7 | 0.5 | 1.3 | 0.3 | 162.8 | 0.1 | 1.3  | 0.7 | 2.0 | 0.5 |
| 47.000 | 25.150 | -0.1 | 0.0 | 0.1  | 0.0 | -0.1 | 0.0 | -0.9 | 0.4 | -0.6 | 0.3 | 2.1  | 0.5 | 2.2  | 0.5 | -1.0 | 0.4 | 1.6 | 0.3 | 169.8 | 0.1 | 1.2  | 0.6 | 2.4 | 0.5 |
| 47.000 | 25.650 | -0.2 | 0.0 | 0.1  | 0.0 | -0.1 | 0.0 | -1.0 | 0.4 | -0.3 | 0.3 | 2.3  | 0.4 | 2.3  | 0.4 | -1.0 | 0.4 | 1.6 | 0.3 | 175.4 | 0.0 | 1.3  | 0.6 | 2.5 | 0.4 |
| 47.000 | 26.150 | -0.2 | 0.0 | 0.2  | 0.0 | -0.1 | 0.0 | -0.7 | 0.4 | 0.0  | 0.3 | 2.1  | 0.4 | 2.1  | 0.4 | -0.7 | 0.4 | 1.4 | 0.3 | 0.9   | 0.1 | 1.5  | 0.6 | 2.2 | 0.4 |
| 47.000 | 26.650 | -0.2 | 0.0 | 0.2  | 0.0 | -0.0 | 0.0 | -0.3 | 0.5 | 0.1  | 0.3 | 1.8  | 0.5 | 1.8  | 0.5 | -0.3 | 0.5 | 1.1 | 0.3 | 2.2   | 0.1 | 1.5  | 0.7 | 1.9 | 0.5 |
| 47.000 | 27.150 | -0.2 | 0.0 | 0.2  | 0.0 | -0.0 | 0.0 | -0.1 | 0.7 | 0.2  | 0.5 | 1.3  | 0.6 | 1.4  | 0.6 | -0.1 | 0.7 | 0.7 | 0.5 | 8.5   | 0.2 | 1.3  | 0.9 | 1.4 | 0.6 |
| 47.000 | 27.650 | -0.2 | 0.0 | 0.2  | 0.0 | -0.0 | 0.0 | 0.0  | 0.5 | 0.1  | 0.3 | 1.4  | 0.4 | 1.4  | 0.4 | +0.0 | 0.5 | 0.7 | 0.3 | 176.0 | 0.1 | 1.4  | 0.6 | 1.4 | 0.4 |
| 47.500 | 22.150 | -0.1 | 0.0 | -0.2 | 0.0 | -0.1 | 0.0 | -0.8 | 0.5 | 0.5  | 0.4 | -1.8 | 0.6 | -0.6 | 0.5 | -2.0 | 0.6 | 0.7 | 0.4 | 67.4  | 0.2 | -2.6 | 0.8 | 2.1 | 0.6 |

|        |        |      |     |      |     |      |     |      |     |      |     |      |     |      |     |      |     |     |     |       |     |      |     |     |     |
|--------|--------|------|-----|------|-----|------|-----|------|-----|------|-----|------|-----|------|-----|------|-----|-----|-----|-------|-----|------|-----|-----|-----|
| 47.500 | 22.650 | -0.1 | 0.0 | -0.1 | 0.0 | -0.1 | 0.0 | -0.8 | 0.4 | 0.4  | 0.4 | -0.7 | 0.6 | -0.4 | 0.5 | -1.2 | 0.6 | 0.4 | 0.4 | 41.2  | 0.5 | -1.6 | 0.8 | 1.2 | 0.6 |
| 47.500 | 23.150 | -0.1 | 0.0 | 0.0  | 0.0 | -0.1 | 0.0 | -0.8 | 0.4 | 0.1  | 0.4 | 0.1  | 0.6 | 0.1  | 0.6 | -0.8 | 0.4 | 0.5 | 0.4 | 8.7   | 0.2 | -0.7 | 0.7 | 0.8 | 0.4 |
| 47.500 | 23.650 | -0.2 | 0.0 | 0.1  | 0.0 | -0.1 | 0.0 | -0.3 | 0.6 | -0.6 | 0.4 | 0.9  | 0.7 | 1.1  | 0.7 | -0.5 | 0.5 | 0.8 | 0.4 | 156.9 | 0.2 | 0.6  | 0.9 | 1.3 | 0.7 |
| 47.500 | 24.150 | -0.2 | 0.0 | 0.1  | 0.0 | -0.1 | 0.0 | -0.4 | 0.5 | -0.8 | 0.4 | 1.8  | 0.6 | 2.1  | 0.6 | -0.7 | 0.5 | 1.4 | 0.4 | 161.2 | 0.1 | 1.4  | 0.8 | 2.2 | 0.6 |
| 47.500 | 24.650 | -0.2 | 0.0 | 0.2  | 0.0 | -0.1 | 0.0 | -0.6 | 0.5 | -1.0 | 0.4 | 2.1  | 0.5 | 2.4  | 0.6 | -0.9 | 0.5 | 1.7 | 0.4 | 162.0 | 0.1 | 1.6  | 0.7 | 2.6 | 0.6 |
| 47.500 | 25.150 | -0.2 | 0.0 | 0.2  | 0.0 | -0.1 | 0.0 | -0.6 | 0.5 | -0.7 | 0.3 | 2.6  | 0.5 | 2.7  | 0.5 | -0.7 | 0.5 | 1.7 | 0.3 | 168.5 | 0.1 | 2.0  | 0.7 | 2.8 | 0.5 |
| 47.500 | 25.650 | -0.2 | 0.0 | 0.3  | 0.0 | -0.1 | 0.0 | -0.6 | 0.5 | -0.4 | 0.3 | 2.7  | 0.5 | 2.7  | 0.5 | -0.7 | 0.5 | 1.7 | 0.3 | 173.6 | 0.1 | 2.1  | 0.7 | 2.8 | 0.5 |
| 47.500 | 26.150 | -0.3 | 0.0 | 0.3  | 0.0 | -0.1 | 0.0 | -0.2 | 0.5 | -0.4 | 0.4 | 2.5  | 0.5 | 2.6  | 0.5 | -0.3 | 0.5 | 1.4 | 0.4 | 171.4 | 0.1 | 2.3  | 0.7 | 2.6 | 0.5 |
| 47.500 | 26.650 | -0.2 | 0.0 | 0.3  | 0.0 | -0.0 | 0.0 | 0.3  | 0.5 | -0.5 | 0.4 | 2.1  | 0.5 | 2.2  | 0.5 | 0.1  | 0.5 | 1.0 | 0.4 | 165.5 | 0.1 | 2.3  | 0.7 | 2.2 | 0.5 |
| 47.500 | 27.150 | -0.2 | 0.0 | 0.3  | 0.0 | -0.0 | 0.0 | 0.7  | 0.6 | -0.6 | 0.4 | 1.2  | 0.6 | 1.6  | 0.5 | 0.3  | 0.6 | 0.6 | 0.4 | 147.4 | 0.3 | 1.9  | 0.8 | 1.6 | 0.5 |
| 48.000 | 24.150 | -0.4 | 0.0 | 0.3  | 0.0 | -0.1 | 0.0 | -0.7 | 0.4 | -0.7 | 0.3 | 2.0  | 0.5 | 2.2  | 0.5 | -0.9 | 0.3 | 1.5 | 0.3 | 166.4 | 0.1 | 1.3  | 0.6 | 2.3 | 0.5 |
| 48.000 | 24.650 | -0.4 | 0.0 | 0.3  | 0.0 | -0.1 | 0.0 | 0.2  | 0.4 | -0.8 | 0.3 | 2.5  | 0.5 | 2.7  | 0.5 | -0.4 | 0.4 | 1.6 | 0.3 | 165.0 | 0.1 | 2.3  | 0.6 | 2.7 | 0.5 |
| 48.000 | 25.150 | -0.4 | 0.0 | 0.4  | 0.0 | -0.1 | 0.0 | 0.3  | 0.4 | -0.7 | 0.3 | 3.0  | 0.5 | 3.1  | 0.5 | 0.1  | 0.4 | 1.5 | 0.3 | 166.3 | 0.1 | 3.3  | 0.6 | 3.1 | 0.5 |
| 48.000 | 25.650 | -0.4 | 0.0 | 0.4  | 0.0 | -0.1 | 0.0 | 0.4  | 0.4 | -0.5 | 0.3 | 2.9  | 0.5 | 3.0  | 0.5 | 0.3  | 0.4 | 1.3 | 0.3 | 169.9 | 0.1 | 3.3  | 0.6 | 3.0 | 0.5 |
| 48.000 | 26.150 | -0.3 | 0.0 | 0.4  | 0.0 | -0.1 | 0.0 | 0.3  | 0.4 | -0.6 | 0.3 | 3.1  | 0.6 | 3.2  | 0.5 | 0.2  | 0.4 | 1.5 | 0.3 | 168.7 | 0.1 | 3.4  | 0.7 | 3.2 | 0.5 |

### S3. Local Reference Frame Transformations

To assess the sensitivity of our GNSS velocity field to the choice of reference frame, we applied three different approaches to transform the original ITRF2014 velocities into local reference frames: (1) Euler pole rotation, (2) network mean removal, and (3) stable station mean removal. Each method removes different components of the velocity field, allowing us to evaluate whether additional local corrections are necessary for our study area.

The Euler pole rotation method treats the study area as a rigid block rotating about an Euler pole. We first removed the mean velocity from all stations to center the velocity field and then identified “stable” stations as those with residual velocity magnitudes below 5 mm/yr. Using this subset, we estimated the Euler rotation parameters ( $\omega_x$ ,  $\omega_y$ ,  $\omega_z$ ) by solving the linearized relationship between plate rotation and surface velocities. The resulting Euler vector represents the optimal rigid rotation for the stable region and was used to predict velocities at all stations. Residuals were then calculated as the difference between observed and predicted velocities. This approach is physically meaningful in regions that can reasonably be approximated as rigid blocks, as it removes both translational and rotational components. Notably, although conducted as an exercise, the Euler rotation nearly replicates the original EU14 velocities, confirming that it does not materially alter our interpretations.

The network mean removal method is simpler, subtracting the average velocity of all stations from each station’s observed velocity. While this centers the velocity field, it does not account for rotational effects or spatial variations in background motion. This approach is commonly used due to its simplicity, but it may be suboptimal in regions with significant rotation or uneven station distribution.

The stable station mean method aims to capture the regional background motion by averaging velocities from a subset of stations presumed to be on the stable plate interior. Stations with ITRF velocity magnitudes below 25 mm/yr were selected, and their mean north and east velocities were subtracted from all stations to obtain residuals. This approach provides an alternative way to account for local deformation while anchoring the field to presumably stable locations.

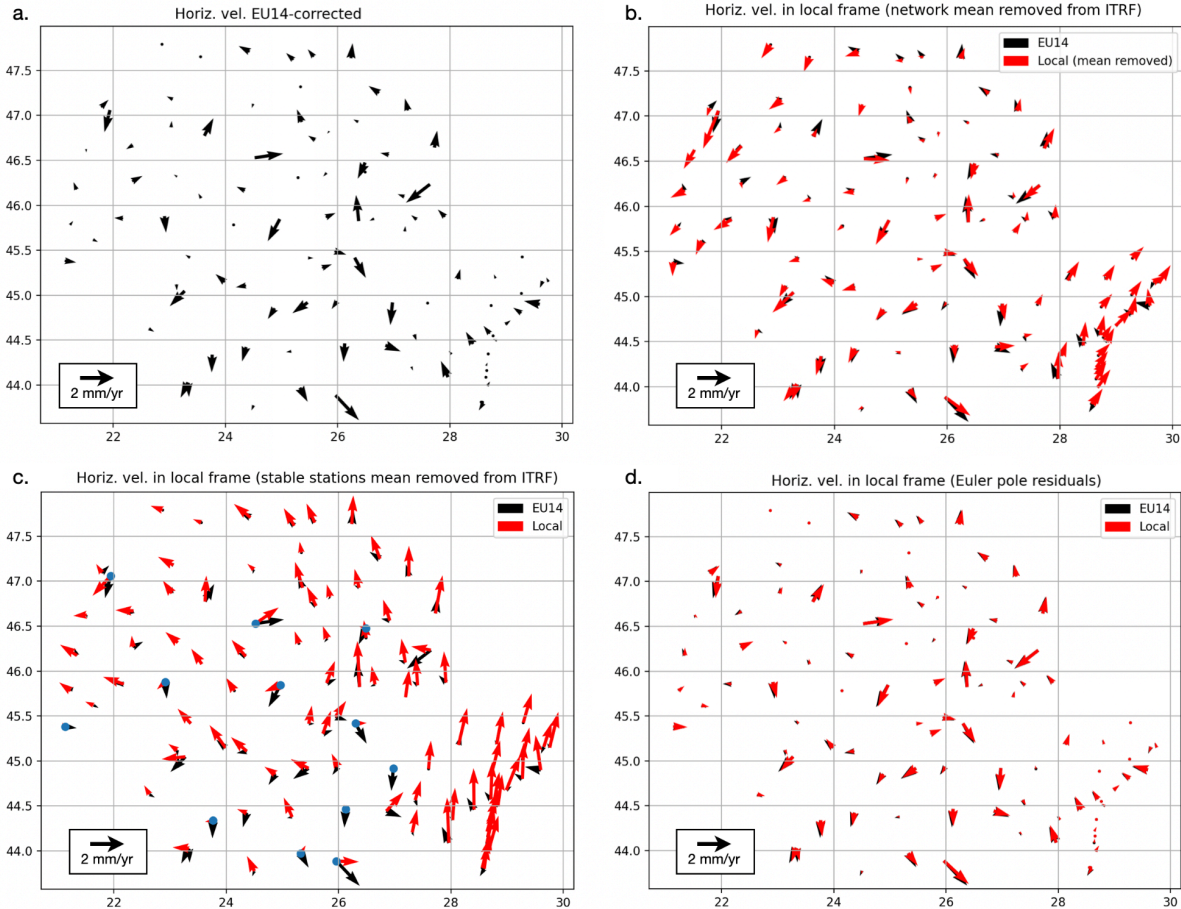

Figure S2. Comparison of horizontal velocity residuals across Romania using different local reference frame transformations. (a) Original velocities in the preferred EU14 reference frame (black vectors). (b) Residual velocities after network mean removal, representing the field with the average translation of all stations subtracted. (c) Residual velocities after stable station mean removal, where the average translation is calculated only from a subset of stable stations (blue circles). (d) Residual velocities after Euler pole rotation, representing the field after removing the rigid-body rotation inverted from the ITRF2014 velocities.

Figure S2 presents the original EU14 velocities alongside the residuals from each transformation method. Original EU14 velocities (Figure S2a) show small magnitudes (mean = 0.34 mm/yr) with a coherent pattern, reflecting the low deformation rates in the region. Euler rotation residuals (Figure S2b) exhibit the smallest magnitudes with no apparent spatial correlation, confirming successful removal of rigid rotation. Network mean residuals (Figure S2c) show intermediate magnitudes and, like the Euler method, appear spatially uncorrelated. Stable stations mean residuals (Figure S2d) display the largest magnitudes with some spatial organization, suggesting that the choice of stable stations may have included stations with small but real local deformation signals, or that the threshold selected does not adequately isolate the true stable plate interior.

### S3.1 Statistical comparisons between reference frames

To evaluate the performance of each method, we computed residual velocities and associated statistics, including the mean residual magnitude, standard deviation, RMS, and mean residual components (see Tables S5, S6, and Figures S2, S3). These analyses reveal that while different approaches yield slightly different residuals, the overall effect on the velocity field is minimal, further justifying the use of EU14 velocities directly in the main manuscript rather than applying local reference frame corrections.

*Table S5: Residual statistics for each local reference frame method.*

| <b>Method</b>          | <b>Mean mag (mm/yr)</b> | <b>Std Mag (mm/yr)</b> | <b>RMS (mm/yr)</b> | <b>Mean Vn (mm/yr)</b> | <b>Mean Ve (mm/yr)</b> |
|------------------------|-------------------------|------------------------|--------------------|------------------------|------------------------|
| EU14                   | 0.34                    | 0.28                   | 0.44               | -0.086                 | 0.087                  |
| Euler Rotation         | 0.55                    | 0.4                    | 0.68               | -0.001                 | 0.008                  |
| Network Mean           | 0.82                    | 0.40                   | 0.92               | 0.005                  | -0.011                 |
| Selected Stations Mean | 1.25                    | 0.55                   | 1.37               | 0.003                  | -0.007                 |

The Euler rotation method yields the smallest residuals (RMS = 0.68 mm/yr), indicating that it best captures the regional background motion. This is followed by the network mean method (RMS = 0.92 mm/yr), while the stable station mean method produces the largest residuals (RMS = 1.37 mm/yr). The superior performance of the Euler method suggests that the region exhibits significant rotational motion that must be accounted for when isolating local deformation signals.

All three methods produce mean residual components near zero (<0.01 mm/yr), confirming that each approach effectively centers the residual field. However, the substantially lower RMS and standard deviation of the Euler method demonstrate its superior ability to remove coherent motion compared to translation-only approaches.

The magnitude of change from the original EU14 velocities varies systematically between methods (Table S6, Figure S3). Notably, the original EU14 velocities are already small in magnitude (mean = 0.34 mm/yr, RMS = 0.44 mm/yr), indicating that the study area is characterized by relatively low tectonic activity or that the ITRF2014 frame already accounts for much of the plate motion.

*Table S6: Changes applied to EU14 velocities by each reference frame method*

| <b>Method</b>          | <b>Mean ΔV (mm/yr)</b> | <b>Std ΔV (mm/yr)</b> | <b>Max ΔV (mm/yr)</b> | <b>RMS ΔV (mm/yr)</b> |
|------------------------|------------------------|-----------------------|-----------------------|-----------------------|
| Euler Rotation         | 0.55                   | 0.40                  | 1.98                  | 0.68                  |
| Network Mean           | 0.82                   | 0.40                  | 2.30                  | 0.92                  |
| Selected Stations Mean | 1.25                   | 0.55                  | 2.58                  | 1.37                  |

The Euler rotation method applies the smallest modifications to the original velocities (mean  $\Delta V = 0.55$  mm/yr), which is consistent with its role in removing only the rotational component while preserving most of the existing velocity field. In contrast, the stable station mean method introduces the largest changes (mean  $\Delta V = 1.25$  mm/yr), suggesting that the stable station subset may include stations with small but significant local motions, or that the threshold of 10 mm/yr is too permissive, allowing stations with residual deformation to influence the reference frame.

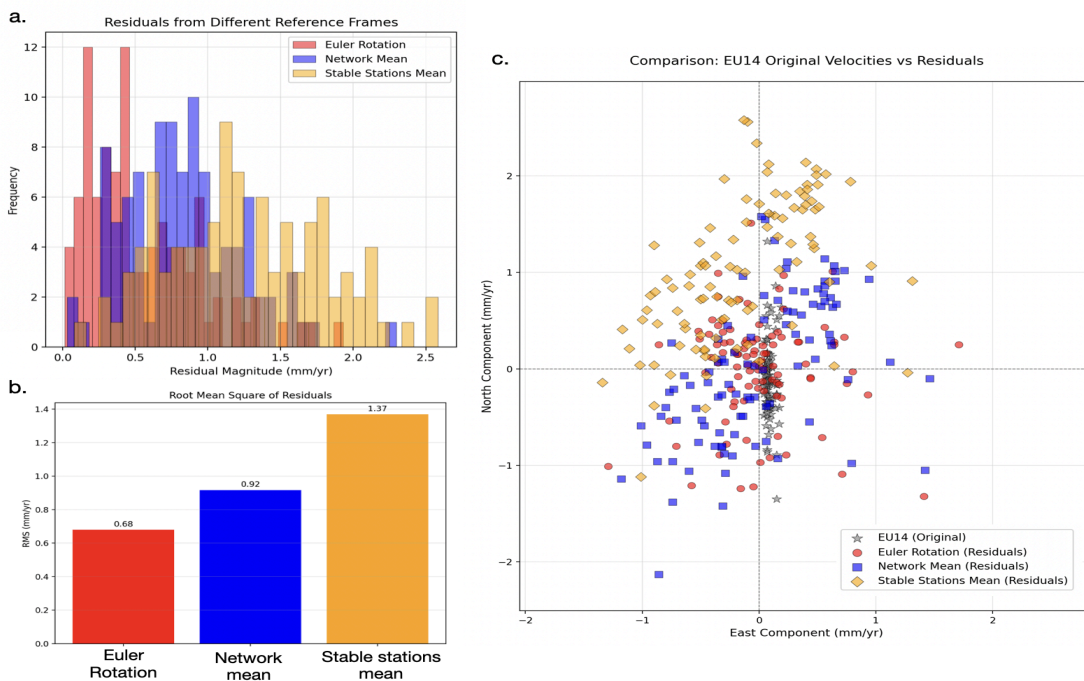

Figure S3: Statistical comparison of local reference frame corrections relative to EU14 velocities. Three panels summarize the effects of three local reference frame approaches (Euler rotation, network mean, and stable station mean) on the GNSS velocity field: (a) Histogram of residual magnitudes for each method, illustrating the distribution and spread of corrections applied to the original EU14 velocities. (b) Bar chart comparing the root mean square (RMS) of residuals for each method, highlighting that Euler rotation produces the lowest RMS. (c) Scatter of residual vectors in north vs. east components, showing EU14 original velocities (gray stars) alongside residuals from each local frame, emphasizing the relative magnitude and direction of corrections.

The differences in performance among the three local reference frame approaches can be understood in terms of what each method is designed to remove. The Euler rotation method accounts for both translational and rotational components by modeling the study area as a rigid block, which is most appropriate when stations sample a region that moves coherently. The low residuals observed for this method (0.68 mm/yr RMS) suggest that this assumption is reasonable for our study area. The network mean method, in contrast, removes only the average translation of all stations, leaving rotational effects uncorrected; the intermediate residuals it produces (0.92 mm/yr RMS) indicate that rotational signals remain and contribute to the variability across the network. The stable station mean method subtracts the average translation of a subset of presumed stable stations, but the larger residuals observed (1.37 mm/yr RMS) likely reflect that the 10 mm/yr threshold may be too lenient, allowing stations affected by local

deformation into the subset, or that the chosen stations do not fully represent the true plate interior. This method may also over-correct by including stations with systematic biases.

Although the Euler rotation yields the smallest residuals among the local transformations, the original EU14 velocities (RMS = 0.44 mm/yr) remain more appropriate for our analysis. The EU14 velocities are already small, indicating that the ITRF2014 reference frame effectively captures the regional plate motion. Local transformations introduce method-dependent uncertainties, require subjective parameter choices, and provide no independent geological constraints. We therefore justify the use of EU14-corrected velocities in the main manuscript as the most robust representation of the GNSS velocity field. The analyses presented here are included in the Supplementary Material to illustrate that alternative reference frame approaches produce comparable results without altering our interpretations or adding additional geological insight.

#### S4. Comparisons with previous studies

To further assess the consistency of our results, we compared our velocity estimates with those of Piña-Valdés at common stations (Figures S4, S5). For the horizontal components (Figure S4), both the north and east velocity components show good agreement, with no significant systematic bias. The majority of stations cluster tightly around the 1:1 line, and deviations are generally small.

For the vertical component (Figure S5), the two solutions show a clear linear relationship, with most stations clustering near the 1:1 line. A slight systematic offset is observed, with our estimates tending to be marginally lower. Differences indicate that most discrepancies are within the expected uncertainty range for vertical GNSS velocities. Importantly, the spatial pattern of uplift and subsidence is coherent between the two datasets, indicating that both solutions capture the same underlying geophysical signal.

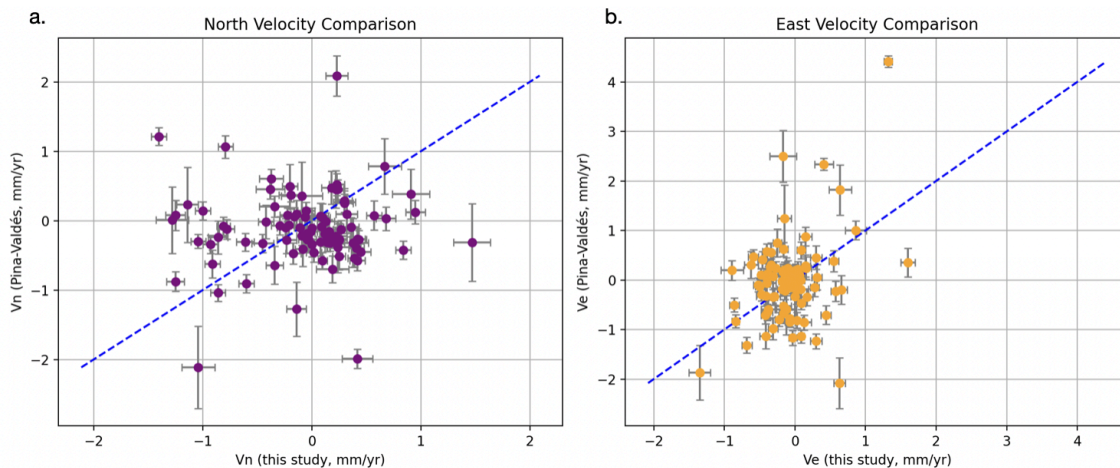

Figure S4. Comparison of horizontal velocities at common stations between this study and Pina-Valdés et al. (a) Scatter plot of northward components ( $V_n$ ) with 1:1 line, showing overall agreement. (b) Scatter plot of eastward components ( $V_e$ ).

Small differences between the two datasets can be attributed to differences in processing strategies, including time series length, network density, and treatment of discontinuities. In particular, the present study benefits from longer observation periods and a detailed, station-by-station evaluation of offsets and equipment changes, which likely contributes to a reduction of residual scatter and improved internal consistency.

Overall, the comparison demonstrates that our results are consistent with an independent solution while providing a refined characterization of the velocity field.

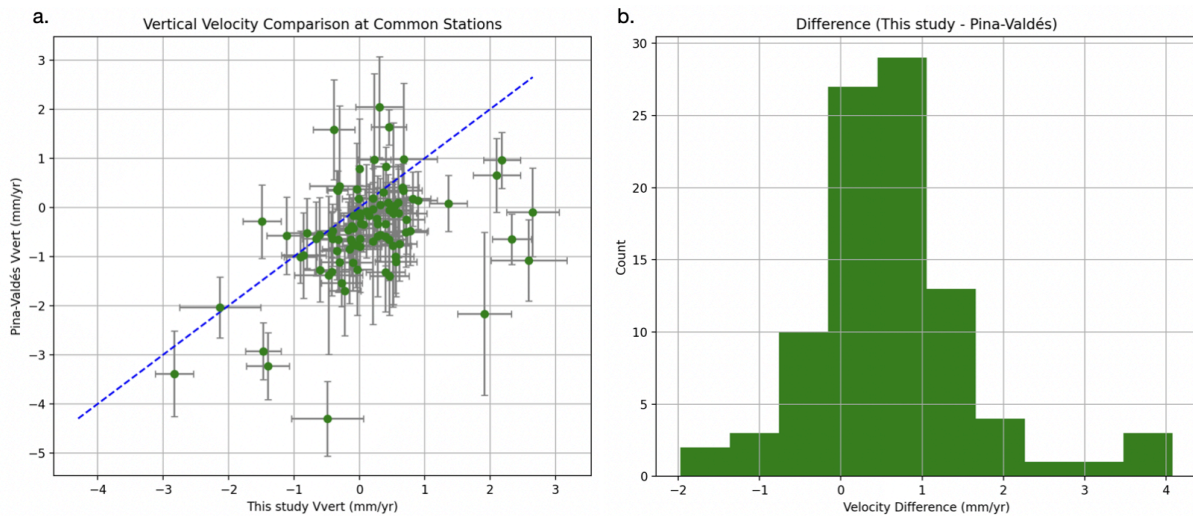

Figure S5. Comparison of vertical velocities at stations common to this study and Pina-Valdés et al. (a) Scatter plot showing velocities from this study versus Pina-Valdés, with the blue dashed line indicating the 1:1 relationship. Most points lie slightly below the 1:1 line, reflecting a small systematic offset, but overall show consistent spatial patterns. (b) Histogram of differences (this study - Pina-Valdés), showing that discrepancies are generally small and within expected uncertainties.
